# Supplementary material
Source: PubMed Central journal article supplement (PMC3993638)
Supplement: JCM.03265-13_zjm999093288so1.pdf [file JCM.03265-13_zjm999093288so1.pdf]

**Table S1. Accession numbers of all the IBV sequences obtained in this study and deposited in GenBank**

| No. | Virus Name                     | PB1      | PB2      | PA       | HA       | NP       | NA       | MP       | NS       |
|-----|--------------------------------|----------|----------|----------|----------|----------|----------|----------|----------|
| 1   | B/Brisbane/60-1/2010           | CY099544 | CY099545 | CY099543 | CY099538 | CY099541 | CY099540 | CY099539 | CY099542 |
| 2   | B/Brisbane/60-2/2010           | CY100407 | CY100408 | CY100406 | CY100401 | CY100404 | CY100403 | CY100402 | CY100405 |
| 3   | B/Brisbane/60-3/2010           | CY099552 | CY099553 | CY099551 | CY099546 | CY099549 | CY099548 | CY099547 | CY099550 |
| 4   | B/Brisbane/60-4/2010           | CY099560 | CY099561 | CY099559 | CY099554 | CY099557 | CY099556 | CY099555 | CY099558 |
| 5   | B/Brisbane/60-5/2010           | CY100415 | CY100416 | CY100414 | CY100409 | CY100412 | CY100411 | CY100410 | CY100413 |
| 6   | B/Brisbane/60-6/2010           | CY100423 | CY100424 | CY100422 | CY100417 | CY100420 | CY100419 | CY100418 | CY100421 |
| 7   | B/Brisbane/60-7/2010           | CY099568 | CY099569 | CY099567 | CY099562 | CY099565 | CY099564 | CY099563 | CY099566 |
| 8   | B/Brisbane/60-9/2010           | CY098868 | CY098869 | CY098867 | CY098862 | CY098865 | CY098864 | CY098863 | CY098866 |
| 9   | B/Brisbane/60-10/2010          | CY098876 | CY098877 | CY098875 | CY098870 | CY098873 | CY098872 | CY098871 | CY098874 |
| 10  | B/Brisbane/60-11/2010          | CY099927 | CY099928 | CY099926 | CY099921 | CY099924 | CY099923 | CY099922 | CY099925 |
| 11  | B/Brisbane/60-12/2010          | CY099576 | CY099577 | CY099575 | CY099570 | CY099573 | CY099572 | CY099571 | CY099574 |
| 12  | B/South Carolina/NHRC0001/2006 | CY098891 | CY098892 | CY098890 | CY098885 | CY098888 | CY098887 | CY098886 | CY098889 |
| 13  | B/Illinois/NHRC0001/2006       | CY099376 | CY099377 | CY099375 | CY099370 | CY099373 | CY099372 | CY099371 | CY099374 |
| 14  | B/California/NHRC0001/2006     | CY099384 | CY099385 | CY099383 | CY099378 | CY099381 | CY099380 | CY099379 | CY099382 |
| 15  | B/Texas/NHRC0001/2006          | CY099863 | CY099864 | CY099862 | CY099857 | CY099860 | CY099859 | CY099858 | CY099861 |
| 16  | B/Missouri/NHRC0001/2006       | CY099935 | CY099936 | CY099934 | CY099929 | CY099932 | CY099931 | CY099930 | CY099933 |
| 17  | B/Georgia/NHRC0001/2006        | CY099392 | CY099393 | CY099391 | CY099386 | CY099389 | CY099388 | CY099387 | CY099390 |
| 18  | B/South Carolina/NHRC0001/2000 | CY099400 | CY099401 | CY099399 | CY099394 | CY099397 | CY099396 | CY099395 | CY099398 |
| 19  | B/South Carolina/NHRC0002/2000 | CY099943 | CY099944 | CY099942 | CY099937 | CY099940 | CY099939 | CY099938 | CY099941 |
| 20  | B/Georgia/NHRC0001/2001        | CY099871 | CY099872 | CY099870 | CY099865 | CY099868 | CY099867 | CY099866 | CY099869 |
| 21  | B/South Carolina/NHRC0001/2001 | CY099408 | CY099409 | CY099407 | CY099402 | CY099405 | CY099404 | CY099403 | CY099406 |
| 22  | B/Missouri/NHRC0001/2001       | CY099416 | CY099417 | CY099415 | CY099410 | CY099413 | CY099412 | CY099411 | CY099414 |
| 23  | B/South Carolina/NHRC0002/2001 | CY099424 | CY099425 | CY099423 | CY099418 | CY099421 | CY099420 | CY099419 | CY099422 |
| 24  | B/Illinois/NHRC0001/2003       | CY099432 | CY099433 | CY099431 | CY099426 | CY099429 | CY099428 | CY099427 | CY099430 |
| 25  | B/Georgia/NHRC0001/2003        | CY099440 | CY099441 | CY099439 | CY099434 | CY099437 | CY099436 | CY099435 | CY099438 |
| 26  | B/Missouri/NHRC0001/2003       | CY099448 | CY099449 | CY099447 | CY099442 | CY099445 | CY099444 | CY099443 | CY099446 |
| 27  | B/South Carolina/NHRC0001/2004 | CY099456 | CY099457 | CY099455 | CY099450 | CY099453 | CY099452 | CY099451 | CY099454 |
| 28  | B/South Carolina/NHRC0001/2005 | CY099879 | CY099880 | CY099878 | CY099873 | CY099876 | CY099875 | CY099874 | CY099877 |
| 29  | B/Texas/NHRC0001/2005          | CY099464 | CY099465 | CY099463 | CY099458 | CY099461 | CY099460 | CY099459 | CY099462 |
| 30  | B/New Jersey/NHRC0001/2005     | CY099472 | CY099473 | CY099471 | CY099466 | CY099469 | CY099468 | CY099467 | CY099470 |
| 31  | B/California/NHRC0004/2003     | CY099480 | CY099481 | CY099479 | CY099474 | CY099477 | CY099476 | CY099475 | CY099478 |
| 32  | B/California/NHRC0005/2003     | CY099488 | CY099489 | CY099487 | CY099482 | CY099485 | CY099484 | CY099483 | CY099486 |
| 33  | B/Hawaii/NHRC0001/2003         | CY098905 | CY098906 | CY098904 | CY098899 | CY098902 | CY098901 | CY098900 | CY098903 |
| 34  | B/California/NHRC0001/2005     | CY099496 | CY099497 | CY099495 | CY099490 | CY099493 | CY099492 | CY099491 | CY099494 |
| 35  | B/California/NHRC0002/2005     | CY099504 | CY099505 | CY099503 | CY099498 | CY099501 | CY099500 | CY099499 | CY099502 |
| 36  | B/California/NHRC0003/2005     | CY099512 | CY099513 | CY099511 | CY099506 | CY099509 | CY099508 | CY099507 | CY099510 |
| 37  | B/California/NHRC0004/2005     | CY099520 | CY099521 | CY099519 | CY099514 | CY099517 | CY099516 | CY099515 | CY099518 |
| 38  | B/California/NHRC0002/2006     | CY099775 | CY099776 | CY099774 | CY099769 | CY099772 | CY099771 | CY099770 | CY099773 |
| 39  | B/California/NHRC0006/2006     | CY099528 | CY099529 | CY099527 | CY099522 | CY099525 | CY099524 | CY099523 | CY099526 |
| 40  | B/California/NHRC0003/2006     | CY099951 | CY099952 | CY099950 | CY099945 | CY099948 | CY099947 | CY099946 | CY099949 |
| 41  | B/California/NHRC0001/2004     | CY098913 | CY098914 | CY098912 | CY098907 | CY098910 | CY098909 | CY098908 | CY098911 |
| 42  | B/California/NHRC0005/2005     | CY099887 | CY099888 | CY099886 | CY099881 | CY099884 | CY099883 | CY099882 | CY099885 |
| 43  | B/California/NHRC0006/2005     | CY099895 | CY099896 | CY099894 | CY099889 | CY099892 | CY099891 | CY099890 | CY099893 |
| 44  | B/California/NHRC0007/2005     | CY098921 | CY098922 | CY098920 | CY098915 | CY098918 | CY098917 | CY098916 | CY098919 |
| 45  | B/California/NHRC0008/2005     | CY099903 | CY099904 | CY099902 | CY099897 | CY099900 | CY099899 | CY099898 | CY099901 |
| 46  | B/California/NHRC0004/2006     | CY099536 | CY099537 | CY099535 | CY099530 | CY099533 | CY099532 | CY099531 | CY099534 |
| 47  | B/California/NHRC0005/2006     | CY099911 | CY099912 | CY099910 | CY099905 | CY099908 | CY099907 | CY099906 | CY099909 |
| 48  | B/Managua/148.02/2010          | CY101010 | CY101011 | CY101009 | CY101004 | CY101007 | CY101006 | CY101005 | CY101008 |
| 49  | B/Managua/164.02/2010          | CY099783 | CY099784 | CY099782 | CY099777 | CY099780 | CY099779 | CY099778 | CY099781 |
| 50  | B/Managua/278.01/2010          | CY101018 | CY101019 | CY101017 | CY101012 | CY101015 | CY101014 | CY101013 | CY101016 |
| 51  | B/Managua/1017.03/2010         | CY101026 | CY101027 | CY101025 | CY101020 | CY101023 | CY101022 | CY101021 | CY101024 |
| 52  | B/Managua/1250.02/2010         | CY099791 | CY099792 | CY099790 | CY099785 | CY099788 | CY099787 | CY099786 | CY099789 |
| 53  | B/Managua/1312.01/2010         | CY100751 | CY100752 | CY100750 | CY100745 | CY100748 | CY100747 | CY100746 | CY100749 |

|     |                        |                                                                         |
|-----|------------------------|-------------------------------------------------------------------------|
| 54  | B/Managua/1361.01/2010 | CY099799 CY099800 CY099798 CY099793 CY099796 CY099795 CY099794 CY099797 |
| 55  | B/Managua/1499.02/2010 | CY100759 CY100760 CY100758 CY100753 CY100756 CY100755 CY100754 CY100757 |
| 56  | B/Managua/1504.03/2010 | CY100759 CY100760 CY100758 CY100753 CY100756 CY100755 CY100754 CY100757 |
| 57  | B/Managua/1873.01/2010 | CY099807 CY099808 CY099806 CY099801 CY099804 CY099803 CY099802 CY099805 |
| 58  | B/Managua/2037.01/2010 | CY100663 CY100664 CY100662 CY100657 CY100660 CY100659 CY100658 CY100661 |
| 59  | B/Managua/2090.02/2010 | CY100671 CY100672 CY100670 CY100665 CY100668 CY100667 CY100666 CY100669 |
| 60  | B/Managua/2630.01/2010 | CY099815 CY099816 CY099814 CY099809 CY099812 CY099811 CY099810 CY099813 |
| 61  | B/Managua/2826.02/2010 | CY100679 CY100680 CY100678 CY100673 CY100676 CY100675 CY100674 CY100677 |
| 62  | B/Managua/3323.01/2010 | CY099823 CY099824 CY099822 CY099817 CY099820 CY099819 CY099818 CY099821 |
| 63  | B/Managua/4015.05/2010 | CY101034 CY101035 CY101033 CY101028 CY101031 CY101030 CY101029 CY101032 |
| 64  | B/Managua/4403.06/2010 | CY099831 CY099832 CY099830 CY099825 CY099828 CY099827 CY099826 CY099829 |
| 65  | B/Managua/4426.04/2010 | CY101042 CY101043 CY101041 CY101036 CY101039 CY101038 CY101037 CY101040 |
| 66  | B/Managua/4437.01/2010 | CY100687 CY100688 CY100686 CY100681 CY100684 CY100683 CY100682 CY100685 |
| 67  | B/Managua/4468.03/2010 | CY100695 CY100696 CY100694 CY100689 CY100692 CY100691 CY100690 CY100693 |
| 68  | B/Managua/4485.05/2010 | CY099839 CY099840 CY099838 CY099833 CY099836 CY099835 CY099834 CY099837 |
| 69  | B/Managua/4755.01/2010 | CY101050 CY101051 CY101049 CY101044 CY101047 CY101046 CY101045 CY101048 |
| 70  | B/Managua/4772.01/2010 | CY100703 CY100704 CY100702 CY100697 CY100700 CY100699 CY100698 CY100701 |
| 71  | B/Managua/4834.02/2010 | CY100711 CY100712 CY100710 CY100705 CY100708 CY100707 CY100706 CY100709 |
| 72  | B/Managua/4847.07/2010 | CY099919 CY099920 CY099918 CY099913 CY099916 CY099915 CY099914 CY099917 |
| 73  | B/Managua/4942.04/2010 | CY099847 CY099848 CY099846 CY099841 CY099844 CY099843 CY099842 CY099845 |
| 74  | B/Managua/5227.05/2010 | CY100719 CY100720 CY100718 CY100713 CY100716 CY100715 CY100714 CY100717 |
| 75  | B/Managua/5454.02/2010 | CY100727 CY100728 CY100726 CY100721 CY100724 CY100723 CY100722 CY100725 |
| 76  | B/Managua/5549.04/2010 | CY100735 CY100736 CY100734 CY100729 CY100732 CY100731 CY100730 CY100733 |
| 77  | B/Managua/5590.04/2010 | CY099855 CY099856 CY099854 CY099849 CY099852 CY099851 CY099850 CY099853 |
| 78  | B/Managua/5748.03/2010 | CY101064 CY101065 CY101063 CY101058 CY101061 CY101060 CY101059 CY101062 |
| 79  | B/Managua/5839.01/2010 | CY100743 CY100744 CY100742 CY100737 CY100740 CY100739 CY100738 CY100741 |
| 80  | B/Managua/5894.02/2010 | CY101072 CY101073 CY101071 CY101066 CY101069 CY101068 CY101067 CY101070 |
| 81  | B/Managua/6006.03/2010 | CY106566 CY106567 CY106565 CY106560 CY106563 CY106562 CY106561 CY106564 |
| 82  | B/Malaysia/06535/1995  | CY119552 CY119553 CY119551 CY119546 CY119549 CY119548 CY119547 CY119550 |
| 83  | B/Malaysia/10815/1996  | CY118289 CY118290 CY118288 CY118283 CY118286 CY118285 CY118284 CY118287 |
| 84  | B/Malaysia/10837/1996  | CY119560 CY119561 CY119559 CY119554 CY119557 CY119556 CY119555 CY119558 |
| 85  | B/Malaysia/10928/1996  | CY119568 CY119569 CY119567 CY119562 CY119565 CY119564 CY119563 CY119566 |
| 86  | B/Malaysia/10941/1996  | CY119576 CY119577 CY119575 CY119570 CY119573 CY119572 CY119571 CY119574 |
| 87  | B/Malaysia/11087/1996  | CY119584 CY119585 CY119583 CY119578 CY119581 CY119580 CY119579 CY119582 |
| 88  | B/Malaysia/11169/1996  | CY119592 CY119593 CY119591 CY119586 CY119589 CY119588 CY119587 CY119590 |
| 89  | B/Malaysia/11185/1996  | CY119600 CY119601 CY119599 CY119594 CY119597 CY119596 CY119595 CY119598 |
| 90  | B/Malaysia/13624/1997  | CY118297 CY118298 CY118296 CY118291 CY118294 CY118293 CY118292 CY118295 |
| 91  | B/Malaysia/13367/1997  | CY119608 CY119609 CY119607 CY119602 CY119605 CY119604 CY119603 CY119606 |
| 92  | B/Malaysia/13693/1997  | CY119616 CY119617 CY119615 CY119610 CY119613 CY119612 CY119611 CY119614 |
| 93  | B/Malaysia/13696/1997  | CY119624 CY119625 CY119623 CY119618 CY119621 CY119620 CY119619 CY119622 |
| 94  | B/Malaysia/15048/1998  | CY119632 CY119633 CY119631 CY119626 CY119629 CY119628 CY119627 CY119630 |
| 95  | B/Malaysia/11721/1997  | CY119640 CY119641 CY119639 CY119634 CY119637 CY119636 CY119635 CY119638 |
| 96  | B/Malaysia/13370/1997  | CY118305 CY118306 CY118304 CY118299 CY118302 CY118301 CY118300 CY118303 |
| 97  | B/Malaysia/13395/1997  | CY119648 CY119649 CY119647 CY119642 CY119645 CY119644 CY119643 CY119646 |
| 98  | B/Malaysia/13396/1997  | CY119656 CY119657 CY119655 CY119650 CY119653 CY119652 CY119651 CY119654 |
| 99  | B/Malaysia/13494/1997  | CY119664 CY119665 CY119663 CY119658 CY119661 CY119660 CY119659 CY119662 |
| 100 | B/Malaysia/24157/2003  | CY120035 CY120036 CY120034 CY120029 CY120032 CY120031 CY120030 CY120033 |
| 101 | B/Malaysia/24296/2003  | CY119672 CY119673 CY119671 CY119666 CY119669 CY119668 CY119667 CY119670 |
| 102 | B/Malaysia/24651/2003  | CY119680 CY119681 CY119679 CY119674 CY119677 CY119676 CY119675 CY119678 |
| 103 | B/Malaysia/24666/2004  | CY119688 CY119689 CY119687 CY119682 CY119685 CY119684 CY119683 CY119686 |
| 104 | B/Malaysia/27127/2004  | CY119696 CY119697 CY119695 CY119690 CY119693 CY119692 CY119691 CY119694 |
| 105 | B/Malaysia/29570/2004  | CY119704 CY119705 CY119703 CY119698 CY119701 CY119700 CY119699 CY119702 |
| 106 | B/Malaysia/30383/2004  | CY118313 CY118314 CY118312 CY118307 CY118310 CY118309 CY118308 CY118311 |
| 107 | B/Malaysia/30238/2004  | CY119712 CY119713 CY119711 CY119706 CY119709 CY119708 CY119707 CY119710 |
| 108 | B/Malaysia/30397/2004  | CY119720 CY119721 CY119719 CY119714 CY119717 CY119716 CY119715 CY119718 |

|     |                                                         |          |          |          |          |          |          |          |          |
|-----|---------------------------------------------------------|----------|----------|----------|----------|----------|----------|----------|----------|
| 109 | B/Malaysia/30474/2004                                   | CY119728 | CY119729 | CY119727 | CY119722 | CY119725 | CY119724 | CY119723 | CY119726 |
| 110 | B/Malaysia/30552/2004                                   | CY119736 | CY119737 | CY119735 | CY119730 | CY119733 | CY119732 | CY119731 | CY119734 |
| 111 | B/Malaysia/30589/2005                                   | CY119744 | CY119745 | CY119743 | CY119738 | CY119741 | CY119740 | CY119739 | CY119742 |
| 112 | B/Malaysia/30743/2005                                   | CY119752 | CY119753 | CY119751 | CY119746 | CY119749 | CY119748 | CY119747 | CY119750 |
| 113 | B/Malaysia/31529/2005                                   | CY119760 | CY119761 | CY119759 | CY119754 | CY119757 | CY119756 | CY119755 | CY119758 |
| 114 | B/Malaysia/31752/2005                                   | CY119768 | CY119769 | CY119767 | CY119762 | CY119765 | CY119764 | CY119763 | CY119766 |
| 115 | B/Malaysia/33021/2005                                   | CY119776 | CY119777 | CY119775 | CY119770 | CY119773 | CY119772 | CY119771 | CY119774 |
| 116 | B/Malaysia/33125/2005                                   | CY118321 | CY118322 | CY118320 | CY118315 | CY118318 | CY118317 | CY118316 | CY118319 |
| 117 | B/Malaysia/33076/2005                                   | CY118329 | CY118330 | CY118328 | CY118323 | CY118326 | CY118325 | CY118324 | CY118327 |
| 118 | B/Malaysia/33271/2005                                   | CY119784 | CY119785 | CY119783 | CY119778 | CY119781 | CY119780 | CY119779 | CY119782 |
| 119 | B/Malaysia/33772/2005                                   | CY119792 | CY119793 | CY119791 | CY119786 | CY119789 | CY119788 | CY119787 | CY119790 |
| 120 | B/Malaysia/33808/2006                                   | CY119800 | CY119801 | CY119799 | CY119794 | CY119797 | CY119796 | CY119795 | CY119798 |
| 121 | B/Malaysia/33830/2006                                   | CY118337 | CY118338 | CY118336 | CY118331 | CY118334 | CY118333 | CY118332 | CY118335 |
| 122 | B/Malaysia/33922/2006                                   | CY119808 | CY119809 | CY119807 | CY119802 | CY119805 | CY119804 | CY119803 | CY119806 |
| 123 | B/Malaysia/33937/2006                                   | CY119816 | CY119817 | CY119815 | CY119810 | CY119813 | CY119812 | CY119811 | CY119814 |
| 124 | B/Malaysia/33938/2006                                   | CY118345 | CY118346 | CY118344 | CY118339 | CY118342 | CY118341 | CY118340 | CY118343 |
| 125 | B/Malaysia/33951/2006                                   | CY119824 | CY119825 | CY119823 | CY119818 | CY119821 | CY119820 | CY119819 | CY119822 |
| 126 | B/Malaysia/34079/2006                                   | CY119832 | CY119833 | CY119831 | CY119826 | CY119829 | CY119828 | CY119827 | CY119830 |
| 127 | B/Malaysia/34094/2006                                   | CY119840 | CY119841 | CY119839 | CY119834 | CY119837 | CY119836 | CY119835 | CY119838 |
| 128 | B/Malaysia/34611/2006                                   | CY118353 | CY118354 | CY118352 | CY118347 | CY118350 | CY118349 | CY118348 | CY118351 |
| 129 | B/Malaysia/1733951/2007                                 | CY119848 | CY119849 | CY119847 | CY119842 | CY119845 | CY119844 | CY119843 | CY119846 |
| 130 | B/Malaysia/1710547/2007                                 | CY118361 | CY118362 | CY118360 | CY118355 | CY118358 | CY118357 | CY118356 | CY118359 |
| 131 | B/Malaysia/1712152/2007                                 | CY119856 | CY119857 | CY119855 | CY119850 | CY119853 | CY119852 | CY119851 | CY119854 |
| 132 | B/Malaysia/1723975/2007                                 | CY119864 | CY119865 | CY119863 | CY119858 | CY119861 | CY119860 | CY119859 | CY119862 |
| 133 | B/Malaysia/1749254/2007                                 | CY119872 | CY119873 | CY119871 | CY119866 | CY119869 | CY119868 | CY119867 | CY119870 |
| 134 | B/Malaysia/1749284/2007                                 | CY119880 | CY119881 | CY119879 | CY119874 | CY119877 | CY119876 | CY119875 | CY119878 |
| 135 | B/Malaysia/1749642/2007                                 | CY118369 | CY118370 | CY118368 | CY118363 | CY118366 | CY118365 | CY118364 | CY118367 |
| 136 | B/Malaysia/1751951/2007                                 | CY119888 | CY119889 | CY119887 | CY119882 | CY119885 | CY119884 | CY119883 | CY119886 |
| 137 | B/Malaysia/1759914/2007                                 | CY119896 | CY119897 | CY119895 | CY119890 | CY119893 | CY119892 | CY119891 | CY119894 |
| 138 | B/Malaysia/1776305/2007                                 | CY119904 | CY119905 | CY119903 | CY119898 | CY119901 | CY119900 | CY119899 | CY119902 |
| 139 | B/Malaysia/1781325/2007                                 | CY119912 | CY119913 | CY119911 | CY119906 | CY119909 | CY119908 | CY119907 | CY119910 |
| 140 | B/Malaysia/1814277/2007                                 | CY120045 | CY120046 | CY120043 | CY120037 | CY120041 | CY120040 | CY120039 | CY120042 |
| 141 | B/Malaysia/1818085/2007                                 | CY119920 | CY119921 | CY119919 | CY119914 | CY119917 | CY119916 | CY119915 | CY119918 |
| 142 | B/Malaysia/1818439/2007                                 | CY119928 | CY119929 | CY119927 | CY119922 | CY119925 | CY119924 | CY119923 | CY119926 |
| 143 | B/Malaysia/1819373/2007                                 | CY119936 | CY119937 | CY119935 | CY119930 | CY119933 | CY119932 | CY119931 | CY119934 |
| 144 | B/Malaysia/1820237/2007                                 | CY118377 | CY118378 | CY118376 | CY118371 | CY118374 | CY118373 | CY118372 | CY118375 |
| 145 | B/Malaysia/1829782/2007                                 | CY118392 | CY118393 | CY118391 | CY118386 | CY118389 | CY118388 | CY118387 | CY118390 |
| 146 | B/Malaysia/1875091/2007                                 | CY118400 | CY118401 | CY118399 | CY118394 | CY118397 | CY118396 | CY118395 | CY118398 |
| 147 | B/Malaysia/30/2007                                      | CY119944 | CY119945 | CY119943 | CY119938 | CY119941 | CY119940 | CY119939 | CY119942 |
| 148 | B/Malaysia/1887865/2007                                 | CY119952 | CY119953 | CY119951 | CY119946 | CY119949 | CY119948 | CY119947 | CY119950 |
| 149 | B/Malaysia/1887872/2007                                 | CY118408 | CY118409 | CY118407 | CY118402 | CY118405 | CY118404 | CY118403 | CY118406 |
| 150 | B/Malaysia/1890240/2007                                 | CY119960 | CY119961 | CY119959 | CY119954 | CY119957 | CY119956 | CY119955 | CY119958 |
| 151 | B/Malaysia/1892514/2007                                 | CY119968 | CY119969 | CY119967 | CY119962 | CY119965 | CY119964 | CY119963 | CY119966 |
| 152 | B/Malaysia/1895275/2007                                 | CY119976 | CY119977 | CY119975 | CY119970 | CY119973 | CY119972 | CY119971 | CY119974 |
| 153 | B/Malaysia/1896500/2007                                 | CY118416 | CY118417 | CY118415 | CY118410 | CY118413 | CY118412 | CY118411 | CY118414 |
| 154 | B/Malaysia/1899839/2007                                 | CY119984 | CY119985 | CY119983 | CY119978 | CY119981 | CY119980 | CY119979 | CY119982 |
| 155 | B/Malaysia/1917686/2007                                 | CY119992 | CY119993 | CY119991 | CY119986 | CY119989 | CY119988 | CY119987 | CY119990 |
| 156 | B/Malaysia/1918984/2007                                 | CY120000 | CY120001 | CY119999 | CY119994 | CY119997 | CY119996 | CY119995 | CY119998 |
| 157 | B/Malaysia/1919534/2008                                 | CY120008 | CY120009 | CY120007 | CY120002 | CY120005 | CY120004 | CY120003 | CY120006 |
| 158 | B/Malaysia/1921279/2008                                 | CY120016 | CY120017 | CY120015 | CY120010 | CY120013 | CY120012 | CY120011 | CY120014 |
| 159 | B/Boston/DB02/2011                                      | CY111492 | CY111493 | CY111491 | CY111486 | CY111489 | CY111488 | CY111487 | CY111490 |
| 160 | B/Lee/1940                                              | CY115117 | CY115118 | CY115116 | CY115111 | CY115114 | CY115113 | CY115112 | CY115115 |
| 161 | B/reassortant/NYMC BX-3(Lee/1940 x Hong Kong/1434/2002) | CY115221 | CY115222 | CY115220 | CY115215 | CY115218 | CY115217 | CY115216 | CY115219 |

|            |                                                                  |                                                                                |
|------------|------------------------------------------------------------------|--------------------------------------------------------------------------------|
| 162        | B/reassortant/NYMC BX-11(Lee/1940 x Florida/07/2004)             | CY115125 CY115126 CY115124 CY115119 CY115122 CY115121 CY115120 CY115123        |
| 163        | B/reassortant/NYMC BX-15(Lee/1940 x Hawaii/33/2004)              | CY115229 CY115230 CY115228 CY115223 CY115226 CY115225 CY115224 CY115227        |
| 164        | B/reassortant/NYMC BX-21(Lee/1940 x Florida/04/2006)             | CY115237 CY115238 CY115236 CY115231 CY115234 CY115233 CY115232 CY115235        |
| 165        | B/reassortant/NYMC BX-21A(Lee/1940 x Florida/04/2006)            | CY115245 CY115246 CY115244 CY115239 CY115242 CY115241 CY115240 CY115243        |
| 166        | B/Pennsylvania/07/2007                                           | CY115133 CY115134 CY115132 CY115127 CY115130 CY115129 CY115128 CY115131        |
| 167        | B/reassortant/NYMC BX-23(Lee/1940 x Pennsylvania/07/2007)        | CY115141 CY115142 CY115140 CY115135 CY115138 CY115137 CY115136 CY115139        |
| 168        | B/reassortant/NYMC BX-23A(Lee/1940 x Pennsylvania/07/2007)       | CY115253 CY115254 CY115252 CY115247 CY115250 CY115249 CY115248 CY115251        |
| 169        | B/Bangladesh/3333/2007                                           | CY115261 CY115262 CY115260 CY115255 CY115258 CY115257 CY115256 CY115259        |
| 170        | B/reassortant/NYMC BX-25(Lee/1940 x Bangladesh/3333/2007)        | CY115269 CY115270 CY115268 CY115263 CY115266 CY115265 CY115264 CY115267        |
| 171        | B/reassortant/NYMC BX-25A(Lee/1940 x Bangladesh/3333/2007)       | CY115149 CY115150 CY115148 CY115143 CY115146 CY115145 CY115144 CY115147        |
| <b>172</b> | <b>B/England/145/2008</b>                                        | <b>CY115277 CY115278 CY115276 CY115271 CY115274 CY115273 CY115272 CY115275</b> |
| 173        | B/reassortant/NYMC BX-27(Lee/1940 x England/145/2008)            | CY115285 CY115286 CY115284 CY115279 CY115282 CY115281 CY115280 CY115283        |
| 174        | B/Fujian-Gulou/1272/2008                                         | CY115293 CY115294 CY115292 CY115287 CY115290 CY115289 CY115288 CY115291        |
| 175        | B/reassortant/NYMC BX-29(Lee/1940 x Fujian-Gulou/1272/2008)      | CY115301 CY115302 CY115300 CY115295 CY115298 CY115297 CY115296 CY115299        |
| 176        | B/reassortant/NYMC BX-29A(Lee/1940 x Fujian-Gulou/1272/2008)     | CY115309 CY115310 CY115308 CY115303 CY115306 CY115305 CY115304 CY115307        |
| 177        | B/Brisbane/60/2008                                               | CY115157 CY115158 CY115156 CY115151 CY115154 CY115153 CY115152 CY115155        |
| 178        | B/reassortant/NYMC BX-31(Lee/1940 x Brisbane/60/2008)            | CY115317 CY115318 CY115316 CY115311 CY115314 CY115313 CY115312 CY115315        |
| 179        | B/reassortant/NYMC BX-31-CL(Lee/1940 x Brisbane/60/2008)         | CY115325 CY115326 CY115324 CY115319 CY115322 CY115321 CY115320 CY115323        |
| 180        | B/reassortant/NYMC BX-31B(Lee/1940 x Brisbane/60/2008)           | CY115333 CY115334 CY115332 CY115327 CY115330 CY115329 CY115328 CY115331        |
| 181        | B/reassortant/NYMC BX-33(Panama/45/1990 x Brisbane/60/2008)      | CY115341 CY115342 CY115340 CY115335 CY115338 CY115337 CY115336 CY115339        |
| 182        | B/reassortant/NYMC BX-33B(Panama/45/1990 x Brisbane/60/2008)     | CY115165 CY115166 CY115164 CY115159 CY115162 CY115161 CY115160 CY115163        |
| 183        | B/reassortant/NYMC BX-35(BX-33B x Brisbane/60/2008)              | CY115349 CY115350 CY115348 CY115343 CY115346 CY115345 CY115344 CY115347        |
| 184        | B/reassortant/NYMC BX-33D(Panama/45/1990 x Brisbane/60/2008)     | CY115357 CY115358 CY115356 CY115351 CY115354 CY115353 CY115352 CY115355        |
| 185        | B/Bangladesh/5945/2009                                           | CY115365 CY115366 CY115364 CY115359 CY115362 CY115361 CY115360 CY115363        |
| 186        | B/reassortant/NYMC BX-37(Panama/45/1990 x Bangladesh/5945/2009)  | CY115373 CY115374 CY115372 CY115367 CY115370 CY115369 CY115368 CY115371        |
| 187        | B/reassortant/NYMC BX-37A(Panama/45/1990 x Bangladesh/5945/2009) | CY115381 CY115382 CY115380 CY115375 CY115378 CY115377 CY115376 CY115379        |
| 188        | B/Hubei-Wujiagang/158/2009                                       | CY115389 CY115390 CY115388 CY115383 CY115386 CY115385 CY115384 CY115387        |
| 189        | B/reassortant/NYMC BX-39(Lee/1940 x Hubei-Wujiagang/158/2009)    | CY115173 CY115174 CY115172 CY115167 CY115170 CY115169 CY115168 CY115171        |
| 190        | B/reassortant/NYMC BX-39A(Lee/1940 x Hubei-Wujiagang/158/2009)   | CY115181 CY115182 CY115180 CY115175 CY115178 CY115177 CY115176 CY115179        |
| <b>191</b> | <b>B/Wisconsin/01/2010</b>                                       | <b>CY115189 CY115190 CY115188 CY115183 CY115186 CY115185 CY115184 CY115187</b> |
| 192        | B/reassortant/NYMC BX-41(Lee/1940 x Wisconsin/01/2010)           | CY115397 CY115398 CY115396 CY115391 CY115394 CY115393 CY115392 CY115395        |
| 193        | B/reassortant/NYMC BX-41A(Lee/1940 x Wisconsin/01/2010)          | CY115405 CY115406 CY115404 CY115399 CY115402 CY115401 CY115400 CY115403        |

|     |                                                           |                                                                         |
|-----|-----------------------------------------------------------|-------------------------------------------------------------------------|
| 194 | B/Hong Kong/259/2010                                      | CY115197 CY115198 CY115196 CY115191 CY115194 CY115193 CY115192 CY115195 |
| 195 | B/reassortant/NYMC BX-43(Lee/1940 x Hong Kong/259/2010)   | CY115205 CY115206 CY115204 CY115199 CY115202 CY115201 CY115200 CY115203 |
| 196 | B/reassortant/NYMC BX-43A(Lee/1940 x Hong Kong/259/2010)  | CY115413 CY115414 CY115412 CY115407 CY115410 CY115409 CY115408 CY115411 |
| 197 | B/reassortant/NYMC BX-43B(Lee/1940 x Hong Kong/259/2010)  | CY115421 CY115422 CY115420 CY115415 CY115418 CY115417 CY115416 CY115419 |
| 198 | B/reassortant/NYMC BX-38-1P-1(Lee/1940 x Panama/45/1990)  | CY115429 CY115430 CY115428 CY115423 CY115426 CY115425 CY115424 CY115427 |
| 199 | B/reassortant/NYMC BX-40-2L-36(Lee/1940 x Panama/45/1990) | CY115437 CY115438 CY115436 CY115431 CY115434 CY115433 CY115432 CY115435 |
| 200 | B/reassortant/NYMC BX-42(Lee/1940 x Panama/45/1990)       | CY115445 CY115446 CY115444 CY115439 CY115442 CY115441 CY115440 CY115443 |
| 201 | B/Panama/45/1990                                          | CY115213 CY115214 CY115212 CY115207 CY115210 CY115209 CY115208 CY115211 |
| 202 | B/Managua/2941.01/2008                                    | CY124858 CY124859 CY124857 CY124852 CY124855 CY124854 CY124853 CY124856 |
| 203 | B/Managua/4702.01/2008                                    | CY124866 CY124867 CY124865 CY124860 CY124863 CY124862 CY124861 CY124864 |
| 204 | B/Managua/2650.02/2008                                    | CY124874 CY124875 CY124873 CY124868 CY124871 CY124870 CY124869 CY124872 |
| 205 | B/Managua/921.01/2008                                     | CY124882 CY124883 CY124881 CY124876 CY124879 CY124878 CY124877 CY124880 |
| 206 | B/Managua/36.01/2008                                      | CY124890 CY124891 CY124889 CY124884 CY124887 CY124886 CY124885 CY124888 |
| 207 | B/Managua/4479.01/2008                                    | CY124898 CY124899 CY124897 CY124892 CY124895 CY124894 CY124893 CY124896 |
| 208 | B/Managua/1365.02/2008                                    | CY124906 CY124907 CY124905 CY124900 CY124903 CY124902 CY124901 CY124904 |
| 209 | B/Managua/3640.01/2008                                    | CY124914 CY124915 CY124913 CY124908 CY124911 CY124910 CY124909 CY124912 |
| 210 | B/Managua/274.02/2008                                     | CY124922 CY124923 CY124921 CY124916 CY124919 CY124918 CY124917 CY124920 |
| 211 | B/Managua/3342.01/2008                                    | CY124930 CY124931 CY124929 CY124924 CY124927 CY124926 CY124925 CY124928 |
| 212 | B/Managua/5024.01/2008                                    | CY124850 CY124851 CY124849 CY124844 CY124847 CY124846 CY124845 CY124848 |
| 213 | B/Managua/3387.03/2008                                    | CY124938 CY124939 CY124937 CY124932 CY124935 CY124934 CY124933 CY124936 |
| 214 | B/Managua/3425.01/2008                                    | CY124946 CY124947 CY124945 CY124940 CY124943 CY124942 CY124941 CY124944 |
| 215 | B/Managua/4498.01/2008                                    | CY124954 CY124955 CY124953 CY124948 CY124951 CY124950 CY124949 CY124952 |
| 216 | B/Managua/1089.01/2008                                    | CY124962 CY124963 CY124961 CY124956 CY124959 CY124958 CY124957 CY124960 |
| 217 | B/Managua/2056.03/2008                                    | CY124970 CY124971 CY124969 CY124964 CY124967 CY124966 CY124965 CY124968 |
| 218 | B/Managua/673.02/2008                                     | CY124978 CY124979 CY124977 CY124972 CY124975 CY124974 CY124973 CY124976 |
| 219 | B/Managua/468.01/2008                                     | CY124986 CY124987 CY124985 CY124980 CY124983 CY124982 CY124981 CY124984 |
| 220 | B/Managua/4982.02/2008                                    | CY124994 CY124995 CY124993 CY124988 CY124991 CY124990 CY124989 CY124992 |
| 221 | B/Managua/177.02/2008                                     | CY125002 CY125003 CY125001 CY124996 CY124999 CY124998 CY124997 CY125000 |
| 222 | B/Tennessee/F2013/2011                                    | CY156968 CY156969 CY156967 CY156962 CY156965 CY156964 CY156963 CY156966 |
| 223 | B/Tennessee/F2005/2010                                    | CY156976 CY156977 CY156975 CY156970 CY156973 CY156972 CY156971 CY156974 |
| 224 | B/Tennessee/F2013A/2011                                   | CY156984 CY156985 CY156983 CY156978 CY156981 CY156980 CY156979 CY156982 |
| 225 | B/Tennessee/F2028/2011                                    | CY156992 CY156993 CY156991 CY156986 CY156989 CY156988 CY156987 CY156990 |
| 226 | B/Tennessee/F2028A/2011                                   | CY156960 CY156961 CY156959 CY156954 CY156957 CY156956 CY156955 CY156958 |
| 227 | B/Tennessee/F2060c59/2011                                 | CY157000 CY157001 CY156999 CY156994 CY156997 CY156996 CY156995 CY156998 |
| 228 | B/Tennessee/F2060c59A/2011                                | CY157008 CY157009 CY157007 CY157002 CY157005 CY157004 CY157003 CY157006 |
| 229 | B/Sydney/7/2002                                           | CY150871 CY150872 CY150870 CY150865 CY150868 CY150867 CY150866 CY150869 |
| 230 | B/Sydney/11/2002                                          | CY150967 CY150968 CY150966 CY150961 CY150964 CY150963 CY150962 CY150965 |
| 231 | B/Brisbane/11/2002                                        | CY151055 CY151056 CY151054 CY151049 CY151052 CY151051 CY151050 CY151053 |
| 232 | B/Victoria/150/2002                                       | CY151151 CY151152 CY151150 CY151145 CY151148 CY151147 CY151146 CY151149 |
| 233 | B/Victoria/506/2002                                       | CY151239 CY151240 CY151238 CY151233 CY151236 CY151235 CY151234 CY151237 |
| 234 | B/Brisbane/39/2002                                        | CY151335 CY151336 CY151334 CY151329 CY151332 CY151331 CY151330 CY151333 |
| 235 | B/Sydney/5/2002                                           | CY150879 CY150880 CY150878 CY150873 CY150876 CY150875 CY150874 CY150877 |
| 236 | B/Brisbane/4/2002                                         | CY150975 CY150976 CY150974 CY150969 CY150972 CY150971 CY150970 CY150973 |
| 237 | B/Sydney/49/2002                                          | CY151063 CY151064 CY151062 CY151057 CY151060 CY151059 CY151058 CY151061 |
| 238 | B/Victoria/149/2002                                       | CY151159 CY151160 CY151158 CY151153 CY151156 CY151155 CY151154 CY151157 |
| 239 | B/Waikato/11/2002                                         | CY151247 CY151248 CY151246 CY151241 CY151244 CY151243 CY151242 CY151245 |
| 240 | B/Townsville/4/2002                                       | CY151343 CY151344 CY151342 CY151337 CY151340 CY151339 CY151338 CY151341 |
| 241 | B/Sydney/204/2002                                         | CY150887 CY150888 CY150886 CY150881 CY150884 CY150883 CY150882 CY150885 |
| 242 | B/Victoria/119/2002                                       | CY150983 CY150984 CY150982 CY150977 CY150980 CY150979 CY150978 CY150981 |
| 243 | B/Brisbane/5/2002                                         | CY151071 CY151072 CY151070 CY151065 CY151068 CY151067 CY151066 CY151069 |

|     |                        |          |          |          |          |          |          |          |          |
|-----|------------------------|----------|----------|----------|----------|----------|----------|----------|----------|
| 244 | B/Auckland/16/2002     | CY151167 | CY151168 | CY151166 | CY151161 | CY151164 | CY151163 | CY151162 | CY151165 |
| 245 | B/Victoria/349/2002    | CY151255 | CY151256 | CY151254 | CY151249 | CY151252 | CY151251 | CY151250 | CY151253 |
| 246 | B/Victoria/354/2002    | CY151351 | CY151352 | CY151350 | CY151345 | CY151348 | CY151347 | CY151346 | CY151349 |
| 247 | B/Sydney/203/2002      | CY150895 | CY150896 | CY150894 | CY150889 | CY150892 | CY150891 | CY150890 | CY150893 |
| 248 | B/Sydney/213/2002      | CY150991 | CY150992 | CY150990 | CY150985 | CY150988 | CY150987 | CY150986 | CY150989 |
| 249 | B/Brisbane/7/2002      | CY151079 | CY151080 | CY151078 | CY151073 | CY151076 | CY151075 | CY151074 | CY151077 |
| 250 | B/Brisbane/24/2002     | CY151175 | CY151176 | CY151174 | CY151169 | CY151172 | CY151171 | CY151170 | CY151173 |
| 251 | B/Sydney/64/2002       | CY151263 | CY151264 | CY151262 | CY151257 | CY151260 | CY151259 | CY151258 | CY151261 |
| 252 | B/Victoria/160/2002    | CY151359 | CY151360 | CY151358 | CY151353 | CY151356 | CY151355 | CY151354 | CY151357 |
| 253 | B/Brisbane/2/2002      | CY150903 | CY150904 | CY150902 | CY150897 | CY150900 | CY150899 | CY150898 | CY150901 |
| 254 | B/Victoria/127/2002    | CY150999 | CY151000 | CY150998 | CY150993 | CY150996 | CY150995 | CY150994 | CY150997 |
| 255 | B/Victoria/502/2002    | CY151087 | CY151088 | CY151086 | CY151081 | CY151084 | CY151083 | CY151082 | CY151085 |
| 256 | B/Victoria/151/2002    | CY151183 | CY151184 | CY151182 | CY151177 | CY151180 | CY151179 | CY151178 | CY151181 |
| 257 | B/Townsville/1/2002    | CY151271 | CY151272 | CY151270 | CY151265 | CY151268 | CY151267 | CY151266 | CY151269 |
| 258 | B/Sydney/84/2002       | CY151367 | CY151368 | CY151366 | CY151361 | CY151364 | CY151363 | CY151362 | CY151365 |
| 259 | B/Waikato/6/2002       | CY150911 | CY150912 | CY150910 | CY150905 | CY150908 | CY150907 | CY150906 | CY150909 |
| 260 | B/Victoria/133/2002    | CY151007 | CY151008 | CY151006 | CY151001 | CY151004 | CY151003 | CY151002 | CY151005 |
| 261 | B/Brisbane/8/2002      | CY151095 | CY151096 | CY151094 | CY151089 | CY151092 | CY151091 | CY151090 | CY151093 |
| 262 | B/Sydney/72/2002       | CY151191 | CY151192 | CY151190 | CY151185 | CY151188 | CY151187 | CY151186 | CY151189 |
| 263 | B/Victoria/351/2002    | CY151279 | CY151280 | CY151278 | CY151273 | CY151276 | CY151275 | CY151274 | CY151277 |
| 264 | B/Brisbane/47/2002     | CY151375 | CY151376 | CY151374 | CY151369 | CY151372 | CY151371 | CY151370 | CY151373 |
| 265 | B/Victoria/113/2002    | CY150919 | CY150920 | CY150918 | CY150913 | CY150916 | CY150915 | CY150914 | CY150917 |
| 266 | B/Sydney/12/2002       | CY151015 | CY151016 | CY151014 | CY151009 | CY151012 | CY151011 | CY151010 | CY151013 |
| 267 | B/Sydney/53/2002       | CY151103 | CY151104 | CY151102 | CY151097 | CY151100 | CY151099 | CY151098 | CY151101 |
| 268 | B/Brisbane/30/2002     | CY151199 | CY151200 | CY151198 | CY151193 | CY151196 | CY151195 | CY151194 | CY151197 |
| 269 | B/Auckland/26/2002     | CY151287 | CY151288 | CY151286 | CY151281 | CY151284 | CY151283 | CY151282 | CY151285 |
| 270 | B/Wellington/5/2002    | CY151383 | CY151384 | CY151382 | CY151377 | CY151380 | CY151379 | CY151378 | CY151381 |
| 271 | B/Victoria/114/2002    | CY150927 | CY150928 | CY150926 | CY150921 | CY150924 | CY150923 | CY150922 | CY150925 |
| 272 | B/Sydney/45/2002       | CY151023 | CY151024 | CY151022 | CY151017 | CY151020 | CY151019 | CY151018 | CY151021 |
| 273 | B/Victoria/156/2002    | CY151111 | CY151112 | CY151110 | CY151105 | CY151108 | CY151107 | CY151106 | CY151109 |
| 274 | B/Victoria/347/2002    | CY151207 | CY151208 | CY151206 | CY151201 | CY151204 | CY151203 | CY151202 | CY151205 |
| 275 | B/Brisbane/34/2002     | CY151295 | CY151296 | CY151294 | CY151289 | CY151292 | CY151291 | CY151290 | CY151293 |
| 276 | B/Brisbane/52/2002     | CY151391 | CY151392 | CY151390 | CY151385 | CY151388 | CY151387 | CY151386 | CY151389 |
| 277 | B/Brisbane/3/2002      | CY150935 | CY150936 | CY150934 | CY150929 | CY150932 | CY150931 | CY150930 | CY150933 |
| 278 | B/Victoria/500/2002    | CY151031 | CY151032 | CY151030 | CY151025 | CY151028 | CY151027 | CY151026 | CY151029 |
| 279 | B/Victoria/503/2002    | CY151119 | CY151120 | CY151118 | CY151113 | CY151116 | CY151115 | CY151114 | CY151117 |
| 280 | B/Brisbane/21/2002     | CY151215 | CY151216 | CY151214 | CY151209 | CY151212 | CY151211 | CY151210 | CY151213 |
| 281 | B/Sydney/85/2002       | CY151303 | CY151304 | CY151302 | CY151297 | CY151300 | CY151299 | CY151298 | CY151301 |
| 282 | B/Sydney/82/2002       | CY151399 | CY151400 | CY151398 | CY151393 | CY151396 | CY151395 | CY151394 | CY151397 |
| 283 | B/Victoria/115/2002    | CY150943 | CY150944 | CY150942 | CY150937 | CY150940 | CY150939 | CY150938 | CY150941 |
| 284 | B/Auckland/14/2002     | CY151039 | CY151040 | CY151038 | CY151033 | CY151036 | CY151035 | CY151034 | CY151037 |
| 285 | B/Brisbane/27/2002     | CY151127 | CY151128 | CY151126 | CY151121 | CY151124 | CY151123 | CY151122 | CY151125 |
| 286 | B/Wellington/2/2002    | CY151223 | CY151224 | CY151222 | CY151217 | CY151220 | CY151219 | CY151218 | CY151221 |
| 287 | B/Victoria/158/2002    | CY151311 | CY151312 | CY151310 | CY151305 | CY151308 | CY151307 | CY151306 | CY151309 |
| 288 | B/Townsville/5/2002    | CY151407 | CY151408 | CY151406 | CY151401 | CY151404 | CY151403 | CY151402 | CY151405 |
| 289 | B/Sydney/211/2002      | CY150951 | CY150952 | CY150950 | CY150945 | CY150948 | CY150947 | CY150946 | CY150949 |
| 290 | B/Sydney/24/2002       | CY151047 | CY151048 | CY151046 | CY151041 | CY151044 | CY151043 | CY151042 | CY151045 |
| 291 | B/Brisbane/25/2002     | CY151135 | CY151136 | CY151134 | CY151129 | CY151132 | CY151131 | CY151130 | CY151133 |
| 292 | B/Sydney/80/2002       | CY151231 | CY151232 | CY151230 | CY151225 | CY151228 | CY151227 | CY151226 | CY151229 |
| 293 | B/Christchurch/84/2002 | CY151319 | CY151320 | CY151318 | CY151313 | CY151316 | CY151315 | CY151314 | CY151317 |
| 294 | B/Victoria/356/2002    | CY151415 | CY151416 | CY151414 | CY151409 | CY151412 | CY151411 | CY151410 | CY151413 |
| 295 | B/Waikato/3/2002       | CY150959 | CY150960 | CY150958 | CY150953 | CY150956 | CY150955 | CY150954 | CY150957 |
| 296 | B/Sydney/70/2002       | CY151143 | CY151144 | CY151142 | CY151137 | CY151140 | CY151139 | CY151138 | CY151141 |
| 297 | B/Victoria/159/2002    | CY151327 | CY151328 | CY151326 | CY151321 | CY151324 | CY151323 | CY151322 | CY151325 |
| 298 | B/Wellington/8/2002    | CY151559 | CY151560 | CY151558 | CY151553 | CY151556 | CY151555 | CY151554 | CY151557 |

|     |                         |          |          |          |          |          |          |          |          |
|-----|-------------------------|----------|----------|----------|----------|----------|----------|----------|----------|
| 299 | B/Waikato/24/2002       | CY151567 | CY151568 | CY151566 | CY151561 | CY151564 | CY151563 | CY151562 | CY151565 |
| 300 | B/Christchurch/133/2002 | CY151575 | CY151576 | CY151574 | CY151569 | CY151572 | CY151571 | CY151570 | CY151573 |
| 301 | B/Auckland/36/2002      | CY151583 | CY151584 | CY151582 | CY151577 | CY151580 | CY151579 | CY151578 | CY151581 |
| 302 | B/Waikato/27/2002       | CY151591 | CY151592 | CY151590 | CY151585 | CY151588 | CY151587 | CY151586 | CY151589 |
| 303 | B/Auckland/1/2003       | CY151599 | CY151600 | CY151598 | CY151593 | CY151596 | CY151595 | CY151594 | CY151597 |
| 304 | B/Christchurch/281/2004 | CY151607 | CY151608 | CY151606 | CY151601 | CY151604 | CY151603 | CY151602 | CY151605 |
| 305 | B/Victoria/107/2005     | CY151615 | CY151616 | CY151614 | CY151609 | CY151612 | CY151611 | CY151610 | CY151613 |
| 306 | B/Wellington/1/2005     | CY151623 | CY151624 | CY151622 | CY151617 | CY151620 | CY151619 | CY151618 | CY151621 |
| 307 | B/Auckland/4/2005       | CY151631 | CY151632 | CY151630 | CY151625 | CY151628 | CY151627 | CY151626 | CY151629 |
| 308 | B/Wellington/3/2005     | CY151639 | CY151640 | CY151638 | CY151633 | CY151636 | CY151635 | CY151634 | CY151637 |
| 309 | B/Waikato/6/2005        | CY151647 | CY151648 | CY151646 | CY151641 | CY151644 | CY151643 | CY151642 | CY151645 |
| 310 | B/Wellington/18/2005    | CY151655 | CY151656 | CY151654 | CY151649 | CY151652 | CY151651 | CY151650 | CY151653 |
| 311 | B/Victoria/505/2005     | CY151663 | CY151664 | CY151662 | CY151657 | CY151660 | CY151659 | CY151658 | CY151661 |
| 312 | B/Auckland/21/2005      | CY151671 | CY151672 | CY151670 | CY151665 | CY151668 | CY151667 | CY151666 | CY151669 |
| 313 | B/Waikato/16/2005       | CY151679 | CY151680 | CY151678 | CY151673 | CY151676 | CY151675 | CY151674 | CY151677 |
| 314 | B/Victoria/506/2005     | CY151687 | CY151688 | CY151686 | CY151681 | CY151684 | CY151683 | CY151682 | CY151685 |
| 315 | B/Christchurch/35/2005  | CY151695 | CY151696 | CY151694 | CY151689 | CY151692 | CY151691 | CY151690 | CY151693 |
| 316 | B/Wellington/28/2005    | CY151703 | CY151704 | CY151702 | CY151697 | CY151700 | CY151699 | CY151698 | CY151701 |
| 317 | B/Victoria/508/2005     | CY151711 | CY151712 | CY151710 | CY151705 | CY151708 | CY151707 | CY151706 | CY151709 |
| 318 | B/Auckland/102/2005     | CY151719 | CY151720 | CY151718 | CY151713 | CY151716 | CY151715 | CY151714 | CY151717 |
| 319 | B/Victoria/510/2005     | CY151727 | CY151728 | CY151726 | CY151721 | CY151724 | CY151723 | CY151722 | CY151725 |
| 320 | B/Waikato/58/2005       | CY151735 | CY151736 | CY151734 | CY151729 | CY151732 | CY151731 | CY151730 | CY151733 |
| 321 | B/Auckland/98/2005      | CY151743 | CY151744 | CY151742 | CY151737 | CY151740 | CY151739 | CY151738 | CY151741 |
| 322 | B/Brisbane/6/2005       | CY151751 | CY151752 | CY151750 | CY151745 | CY151748 | CY151747 | CY151746 | CY151749 |
| 323 | B/Christchurch/71/2005  | CY151759 | CY151760 | CY151758 | CY151753 | CY151756 | CY151755 | CY151754 | CY151757 |
| 324 | B/Victoria/114/2005     | CY151767 | CY151768 | CY151766 | CY151761 | CY151764 | CY151763 | CY151762 | CY151765 |
| 325 | B/Waikato/105/2005      | CY151775 | CY151776 | CY151774 | CY151769 | CY151772 | CY151771 | CY151770 | CY151773 |
| 326 | B/Auckland/109/2005     | CY151783 | CY151784 | CY151782 | CY151777 | CY151780 | CY151779 | CY151778 | CY151781 |
| 327 | B/Wellington/69/2005    | CY151791 | CY151792 | CY151790 | CY151785 | CY151788 | CY151787 | CY151786 | CY151789 |
| 328 | B/Victoria/514/2005     | CY151799 | CY151800 | CY151798 | CY151793 | CY151796 | CY151795 | CY151794 | CY151797 |
| 329 | B/Victoria/515/2005     | CY151807 | CY151808 | CY151806 | CY151801 | CY151804 | CY151803 | CY151802 | CY151805 |
| 330 | B/Christchurch/120/2005 | CY151815 | CY151816 | CY151814 | CY151809 | CY151812 | CY151811 | CY151810 | CY151813 |
| 331 | B/Brisbane/8/2005       | CY151823 | CY151824 | CY151822 | CY151817 | CY151820 | CY151819 | CY151818 | CY151821 |
| 332 | B/Auckland/126/2005     | CY151831 | CY151832 | CY151830 | CY151825 | CY151828 | CY151827 | CY151826 | CY151829 |
| 333 | B/Victoria/517/2005     | CY151839 | CY151840 | CY151838 | CY151833 | CY151836 | CY151835 | CY151834 | CY151837 |
| 334 | B/Waikato/188/2005      | CY151847 | CY151848 | CY151846 | CY151841 | CY151844 | CY151843 | CY151842 | CY151845 |
| 335 | B/Victoria/308/2005     | CY151855 | CY151856 | CY151854 | CY151849 | CY151852 | CY151851 | CY151850 | CY151853 |
| 336 | B/Victoria/518/2005     | CY151863 | CY151864 | CY151862 | CY151857 | CY151860 | CY151859 | CY151858 | CY151861 |
| 337 | B/Brisbane/11/2005      | CY151871 | CY151872 | CY151870 | CY151865 | CY151868 | CY151867 | CY151866 | CY151869 |
| 338 | B/Wellington/87/2005    | CY151879 | CY151880 | CY151878 | CY151873 | CY151876 | CY151875 | CY151874 | CY151877 |
| 339 | B/Brisbane/10/2005      | CY151887 | CY151888 | CY151886 | CY151881 | CY151884 | CY151883 | CY151882 | CY151885 |
| 340 | B/Townsville/6/2005     | CY151895 | CY151896 | CY151894 | CY151889 | CY151892 | CY151891 | CY151890 | CY151893 |
| 341 | B/Sydney/25/2005        | CY151903 | CY151904 | CY151902 | CY151897 | CY151900 | CY151899 | CY151898 | CY151901 |
| 342 | B/Townsville/8/2005     | CY151911 | CY151912 | CY151910 | CY151905 | CY151908 | CY151907 | CY151906 | CY151909 |
| 343 | B/Sydney/12/2005        | CY151919 | CY151920 | CY151918 | CY151913 | CY151916 | CY151915 | CY151914 | CY151917 |
| 344 | B/Christchurch/209/2005 | CY151927 | CY151928 | CY151926 | CY151921 | CY151924 | CY151923 | CY151922 | CY151925 |
| 345 | B/Brisbane/15/2005      | CY151935 | CY151936 | CY151934 | CY151929 | CY151932 | CY151931 | CY151930 | CY151933 |
| 346 | B/Townsville/9/2005     | CY151943 | CY151944 | CY151942 | CY151937 | CY151940 | CY151939 | CY151938 | CY151941 |
| 347 | B/Victoria/120/2005     | CY151951 | CY151952 | CY151950 | CY151945 | CY151948 | CY151947 | CY151946 | CY151949 |
| 348 | B/Victoria/121/2005     | CY151959 | CY151960 | CY151958 | CY151953 | CY151956 | CY151955 | CY151954 | CY151957 |
| 349 | B/Victoria/522/2005     | CY151967 | CY151968 | CY151966 | CY151961 | CY151964 | CY151963 | CY151962 | CY151965 |
| 350 | B/Victoria/521/2005     | CY151975 | CY151976 | CY151974 | CY151969 | CY151972 | CY151971 | CY151970 | CY151973 |
| 351 | B/Brisbane/19/2005      | CY151983 | CY151984 | CY151982 | CY151977 | CY151980 | CY151979 | CY151978 | CY151981 |
| 352 | B/Brisbane/26/2005      | CY151991 | CY151992 | CY151990 | CY151985 | CY151988 | CY151987 | CY151986 | CY151989 |
| 353 | B/Otago/13/2005         | CY151999 | CY152000 | CY151998 | CY151993 | CY151996 | CY151995 | CY151994 | CY151997 |

|     |                         |          |          |          |          |          |          |          |          |
|-----|-------------------------|----------|----------|----------|----------|----------|----------|----------|----------|
| 354 | B/Brisbane/36/2005      | CY152007 | CY152008 | CY152006 | CY152001 | CY152004 | CY152003 | CY152002 | CY152005 |
| 355 | B/Victoria/303/2005     | CY152015 | CY152016 | CY152014 | CY152009 | CY152012 | CY152011 | CY152010 | CY152013 |
| 356 | B/Victoria/122/2005     | CY152023 | CY152024 | CY152022 | CY152017 | CY152020 | CY152019 | CY152018 | CY152021 |
| 357 | B/Brisbane/38/2005      | CY152031 | CY152032 | CY152030 | CY152025 | CY152028 | CY152027 | CY152026 | CY152029 |
| 358 | B/Townsville/04/2005    | CY152039 | CY152040 | CY152038 | CY152033 | CY152036 | CY152035 | CY152034 | CY152037 |
| 359 | B/Wellington/94/2005    | CY152047 | CY152048 | CY152046 | CY152041 | CY152044 | CY152043 | CY152042 | CY152045 |
| 360 | B/Brisbane/43/2005      | CY152055 | CY152056 | CY152054 | CY152049 | CY152052 | CY152051 | CY152050 | CY152053 |
| 361 | B/Victoria/307/2005     | CY152063 | CY152064 | CY152062 | CY152057 | CY152060 | CY152059 | CY152058 | CY152061 |
| 362 | B/Victoria/1308/2005    | CY152071 | CY152072 | CY152070 | CY152065 | CY152068 | CY152067 | CY152066 | CY152069 |
| 363 | B/Brisbane/65/2005      | CY152079 | CY152080 | CY152078 | CY152073 | CY152076 | CY152075 | CY152074 | CY152077 |
| 364 | B/Victoria/524/2005     | CY152087 | CY152088 | CY152086 | CY152081 | CY152084 | CY152083 | CY152082 | CY152085 |
| 365 | B/Sydney/27/2005        | CY152095 | CY152096 | CY152094 | CY152089 | CY152092 | CY152091 | CY152090 | CY152093 |
| 366 | B/Sydney/20/2005        | CY152103 | CY152104 | CY152102 | CY152097 | CY152100 | CY152099 | CY152098 | CY152101 |
| 367 | B/Brisbane/68/2005      | CY152111 | CY152112 | CY152110 | CY152105 | CY152108 | CY152107 | CY152106 | CY152109 |
| 368 | B/Sydney/18/2005        | CY152119 | CY152120 | CY152118 | CY152113 | CY152116 | CY152115 | CY152114 | CY152117 |
| 369 | B/Christchurch/263/2005 | CY149834 | CY149835 | CY149833 | CY149828 | CY149831 | CY149830 | CY149829 | CY149832 |
| 370 | B/Sydney/19/2005        | CY152127 | CY152128 | CY152126 | CY152121 | CY152124 | CY152123 | CY152122 | CY152125 |
| 371 | B/Victoria/525/2005     | CY152135 | CY152136 | CY152134 | CY152129 | CY152132 | CY152131 | CY152130 | CY152133 |
| 372 | B/Brisbane/77/2005      | CY152143 | CY152144 | CY152142 | CY152137 | CY152140 | CY152139 | CY152138 | CY152141 |
| 373 | B/Sydney/29/2005        | CY149842 | CY149843 | CY149841 | CY149836 | CY149839 | CY149838 | CY149837 | CY149840 |
| 374 | B/Brisbane/60/2005      | CY152151 | CY152152 | CY152150 | CY152145 | CY152148 | CY152147 | CY152146 | CY152149 |
| 375 | B/Victoria/527/2005     | CY152159 | CY152160 | CY152158 | CY152153 | CY152156 | CY152155 | CY152154 | CY152157 |
| 376 | B/Brisbane/90/2005      | CY152167 | CY152168 | CY152166 | CY152161 | CY152164 | CY152163 | CY152162 | CY152165 |
| 377 | B/Townsville/18/2005    | CY152175 | CY152176 | CY152174 | CY152169 | CY152172 | CY152171 | CY152170 | CY152173 |
| 378 | B/Sydney/15/2005        | CY152183 | CY152184 | CY152182 | CY152177 | CY152180 | CY152179 | CY152178 | CY152181 |
| 379 | B/Otago/18/2005         | CY152191 | CY152192 | CY152190 | CY152185 | CY152188 | CY152187 | CY152186 | CY152189 |
| 380 | B/Brisbane/85/2005      | CY152199 | CY152200 | CY152198 | CY152193 | CY152196 | CY152195 | CY152194 | CY152197 |
| 381 | B/Brisbane/97/2005      | CY152207 | CY152208 | CY152206 | CY152201 | CY152204 | CY152203 | CY152202 | CY152205 |
| 382 | B/Sydney/503/2005       | CY152215 | CY152216 | CY152214 | CY152209 | CY152212 | CY152211 | CY152210 | CY152213 |
| 383 | B/Victoria/310/2005     | CY152223 | CY152224 | CY152222 | CY152217 | CY152220 | CY152219 | CY152218 | CY152221 |
| 384 | B/Newcastle/12/2005     | CY152232 | CY152233 | CY152231 | CY152225 | CY152229 | CY152228 | CY152227 | CY152230 |
| 385 | B/Victoria/528/2005     | CY152240 | CY152241 | CY152239 | CY152234 | CY152237 | CY152236 | CY152235 | CY152238 |
| 386 | B/Brisbane/101/2005     | CY149850 | CY149852 | CY149849 | CY149844 | CY149847 | CY149846 | CY149845 | CY149848 |
| 387 | B/Sydney/504/2005       | CY152248 | CY152249 | CY152247 | CY152242 | CY152245 | CY152244 | CY152243 | CY152246 |
| 388 | B/Brisbane/99/2005      | CY152256 | CY152257 | CY152255 | CY152250 | CY152253 | CY152252 | CY152251 | CY152254 |
| 389 | B/Sydney/505/2005       | CY152264 | CY152265 | CY152263 | CY152258 | CY152261 | CY152260 | CY152259 | CY152262 |
| 390 | B/Brisbane/103/2005     | CY152272 | CY152273 | CY152271 | CY152266 | CY152269 | CY152268 | CY152267 | CY152270 |
| 391 | B/Victoria/532/2005     | CY152280 | CY152281 | CY152279 | CY152274 | CY152277 | CY152276 | CY152275 | CY152278 |
| 392 | B/Brisbane/2/2006       | CY152288 | CY152289 | CY152287 | CY152282 | CY152285 | CY152284 | CY152283 | CY152286 |
| 393 | B/Brisbane/1/2006       | CY152296 | CY152297 | CY152295 | CY152290 | CY152293 | CY152292 | CY152291 | CY152294 |
| 394 | B/Christchurch/4/2006   | CY152304 | CY152305 | CY152303 | CY152298 | CY152301 | CY152300 | CY152299 | CY152302 |
| 395 | B/Victoria/500/2006     | CY149859 | CY149860 | CY149858 | CY149853 | CY149856 | CY149855 | CY149854 | CY149857 |
| 396 | B/Victoria/501/2006     | CY152312 | CY152313 | CY152311 | CY152306 | CY152309 | CY152308 | CY152307 | CY152310 |
| 397 | B/Victoria/503/2006     | CY149867 | CY149868 | CY149866 | CY149861 | CY149864 | CY149863 | CY149862 | CY149865 |
| 398 | B/Victoria/504/2006     | CY152320 | CY152321 | CY152319 | CY152314 | CY152317 | CY152316 | CY152315 | CY152318 |
| 399 | B/Victoria/505/2006     | CY152328 | CY152329 | CY152327 | CY152322 | CY152325 | CY152324 | CY152323 | CY152326 |
| 400 | B/Victoria/101/2006     | CY152336 | CY152337 | CY152335 | CY152330 | CY152333 | CY152332 | CY152331 | CY152334 |
| 401 | B/Victoria/303/2006     | CY152344 | CY152345 | CY152343 | CY152338 | CY152341 | CY152340 | CY152339 | CY152342 |
| 402 | B/Victoria/304/2006     | CY152352 | CY152353 | CY152351 | CY152346 | CY152349 | CY152348 | CY152347 | CY152350 |
| 403 | B/Victoria/318/2006     | CY152360 | CY152361 | CY152359 | CY152354 | CY152357 | CY152356 | CY152355 | CY152358 |
| 404 | B/Victoria/306/2006     | CY152368 | CY152369 | CY152367 | CY152362 | CY152365 | CY152364 | CY152363 | CY152366 |
| 405 | B/Wellington/1/2006     | CY152376 | CY152377 | CY152375 | CY152370 | CY152373 | CY152372 | CY152371 | CY152374 |
| 406 | B/Victoria/307/2006     | CY152384 | CY152385 | CY152383 | CY152378 | CY152381 | CY152380 | CY152379 | CY152382 |
| 407 | B/Victoria/312/2006     | CY152392 | CY152393 | CY152391 | CY152386 | CY152389 | CY152388 | CY152387 | CY152390 |
| 408 | B/Victoria/309/2006     | CY152400 | CY152401 | CY152399 | CY152394 | CY152397 | CY152396 | CY152395 | CY152398 |



|     |                        |          |          |          |          |          |          |          |          |
|-----|------------------------|----------|----------|----------|----------|----------|----------|----------|----------|
| 409 | B/Victoria/104/2006    | CY152408 | CY152409 | CY152407 | CY152402 | CY152405 | CY152404 | CY152403 | CY152406 |
| 410 | B/Victoria/509/2006    | CY152416 | CY152417 | CY152415 | CY152410 | CY152413 | CY152412 | CY152411 | CY152414 |
| 411 | B/Sydney/508/2006      | CY152424 | CY152425 | CY152423 | CY152418 | CY152421 | CY152420 | CY152419 | CY152422 |
| 412 | B/Sydney/509/2006      | CY152432 | CY152433 | CY152431 | CY152426 | CY152429 | CY152428 | CY152427 | CY152430 |
| 413 | B/Victoria/325/2006    | CY152440 | CY152441 | CY152439 | CY152434 | CY152437 | CY152436 | CY152435 | CY152438 |
| 414 | B/Victoria/100/2006    | CY152448 | CY152449 | CY152447 | CY152442 | CY152445 | CY152444 | CY152443 | CY152446 |
| 415 | B/Victoria/326/2006    | CY152456 | CY152457 | CY152455 | CY152450 | CY152453 | CY152452 | CY152451 | CY152454 |
| 416 | B/Sydney/510/2006      | CY152464 | CY152465 | CY152463 | CY152458 | CY152461 | CY152460 | CY152459 | CY152462 |
| 417 | B/Victoria/327/2006    | CY152472 | CY152473 | CY152471 | CY152466 | CY152469 | CY152468 | CY152467 | CY152470 |
| 418 | B/Brisbane/10/2006     | CY152480 | CY152481 | CY152479 | CY152474 | CY152477 | CY152476 | CY152475 | CY152478 |
| 419 | B/Sydney/7/2006        | CY152488 | CY152489 | CY152487 | CY152482 | CY152485 | CY152484 | CY152483 | CY152486 |
| 420 | B/Brisbane/8/2006      | CY152496 | CY152497 | CY152495 | CY152490 | CY152493 | CY152492 | CY152491 | CY152494 |
| 421 | B/Victoria/328/2006    | CY152504 | CY152505 | CY152503 | CY152498 | CY152501 | CY152500 | CY152499 | CY152502 |
| 422 | B/Sydney/8/2006        | CY152512 | CY152513 | CY152511 | CY152506 | CY152509 | CY152508 | CY152507 | CY152510 |
| 423 | B/Sydney/9/2006        | CY152520 | CY152521 | CY152519 | CY152514 | CY152517 | CY152516 | CY152515 | CY152518 |
| 424 | B/Victoria/329/2006    | CY152528 | CY152529 | CY152527 | CY152522 | CY152525 | CY152524 | CY152523 | CY152526 |
| 425 | B/Victoria/330/2006    | CY152536 | CY152537 | CY152535 | CY152530 | CY152533 | CY152532 | CY152531 | CY152534 |
| 426 | B/Brisbane/9/2006      | CY152544 | CY152545 | CY152543 | CY152538 | CY152541 | CY152540 | CY152539 | CY152542 |
| 427 | B/Sydney/10/2006       | CY149875 | CY149876 | CY149874 | CY149869 | CY149872 | CY149871 | CY149870 | CY149873 |
| 428 | B/Sydney/12/2006       | CY152552 | CY152553 | CY152551 | CY152546 | CY152549 | CY152548 | CY152547 | CY152550 |
| 429 | B/Sydney/14/2006       | CY152560 | CY152561 | CY152559 | CY152554 | CY152557 | CY152556 | CY152555 | CY152558 |
| 430 | B/Sydney/11/2006       | CY152568 | CY152569 | CY152567 | CY152562 | CY152565 | CY152564 | CY152563 | CY152566 |
| 431 | B/Brisbane/13/2006     | CY152576 | CY152577 | CY152575 | CY152570 | CY152573 | CY152572 | CY152571 | CY152574 |
| 432 | B/Brisbane/14/2006     | CY152584 | CY152585 | CY152583 | CY152578 | CY152581 | CY152580 | CY152579 | CY152582 |
| 433 | B/Victoria/332/2006    | CY149883 | CY149884 | CY149882 | CY149877 | CY149880 | CY149879 | CY149878 | CY149881 |
| 434 | B/Brisbane/16/2006     | CY152592 | CY152593 | CY152591 | CY152586 | CY152589 | CY152588 | CY152587 | CY152590 |
| 435 | B/Victoria/333/2006    | CY152600 | CY152601 | CY152599 | CY152594 | CY152597 | CY152596 | CY152595 | CY152598 |
| 436 | B/Brisbane/17/2006     | CY152608 | CY152609 | CY152607 | CY152602 | CY152605 | CY152604 | CY152603 | CY152606 |
| 437 | B/Brisbane/23/2006     | CY152616 | CY152617 | CY152615 | CY152610 | CY152613 | CY152612 | CY152611 | CY152614 |
| 438 | B/Brisbane/41/2006     | CY152624 | CY152625 | CY152623 | CY152618 | CY152621 | CY152620 | CY152619 | CY152622 |
| 439 | B/Sydney/203/2006      | CY152632 | CY152633 | CY152631 | CY152626 | CY152629 | CY152628 | CY152627 | CY152630 |
| 440 | B/Sydney/70/2006       | CY152640 | CY152641 | CY152639 | CY152634 | CY152637 | CY152636 | CY152635 | CY152638 |
| 441 | B/Brisbane/31/2006     | CY152648 | CY152649 | CY152647 | CY152642 | CY152645 | CY152644 | CY152643 | CY152646 |
| 442 | B/Victoria/110/2006    | CY152656 | CY152657 | CY152655 | CY152650 | CY152653 | CY152652 | CY152651 | CY152654 |
| 443 | B/Sydney/71/2006       | CY152664 | CY152665 | CY152663 | CY152658 | CY152661 | CY152660 | CY152659 | CY152662 |
| 444 | B/Brisbane/38/2006     | CY152672 | CY152673 | CY152671 | CY152666 | CY152669 | CY152668 | CY152667 | CY152670 |
| 445 | B/Sydney/74/2006       | CY152680 | CY152681 | CY152679 | CY152674 | CY152677 | CY152676 | CY152675 | CY152678 |
| 446 | B/Sydney/210/2006      | CY149891 | CY149892 | CY149890 | CY149885 | CY149888 | CY149887 | CY149886 | CY149889 |
| 447 | B/Sydney/207/2006      | CY149899 | CY149900 | CY149898 | CY149893 | CY149896 | CY149895 | CY149894 | CY149897 |
| 448 | B/Sydney/205/2006      | CY152688 | CY152689 | CY152687 | CY152682 | CY152685 | CY152684 | CY152683 | CY152686 |
| 449 | B/Brisbane/39/2006     | CY152696 | CY152697 | CY152695 | CY152690 | CY152693 | CY152692 | CY152691 | CY152694 |
| 450 | B/Brisbane/43/2006     | CY152704 | CY152705 | CY152703 | CY152698 | CY152701 | CY152700 | CY152699 | CY152702 |
| 451 | B/Brisbane/44/2006     | CY152712 | CY152713 | CY152711 | CY152706 | CY152709 | CY152708 | CY152707 | CY152710 |
| 452 | B/Brisbane/67/2006     | CY152720 | CY152721 | CY152719 | CY152714 | CY152717 | CY152716 | CY152715 | CY152718 |
| 453 | B/Sydney/79/2006       | CY152728 | CY152729 | CY152727 | CY152722 | CY152725 | CY152724 | CY152723 | CY152726 |
| 454 | B/Brisbane/63/2006     | CY152736 | CY152737 | CY152735 | CY152730 | CY152733 | CY152732 | CY152731 | CY152734 |
| 455 | B/Brisbane/74/2006     | CY152744 | CY152745 | CY152743 | CY152738 | CY152741 | CY152740 | CY152739 | CY152742 |
| 456 | B/Sydney/83/2006       | CY152752 | CY152753 | CY152751 | CY152746 | CY152749 | CY152748 | CY152747 | CY152750 |
| 457 | B/Wellington/85/2006   | CY149907 | CY149908 | CY149906 | CY149901 | CY149904 | CY149903 | CY149902 | CY149905 |
| 458 | B/Brisbane/77/2006     | CY152760 | CY152761 | CY152759 | CY152754 | CY152757 | CY152756 | CY152755 | CY152758 |
| 459 | B/Christchurch/75/2006 | CY149915 | CY149916 | CY149914 | CY149909 | CY149912 | CY149911 | CY149910 | CY149913 |
| 460 | B/Brisbane/84/2006     | CY152768 | CY152769 | CY152767 | CY152762 | CY152765 | CY152764 | CY152763 | CY152766 |
| 461 | B/Brisbane/90/2006     | CY152776 | CY152777 | CY152775 | CY152770 | CY152773 | CY152772 | CY152771 | CY152774 |
| 462 | B/Brisbane/92/2006     | CY152784 | CY152785 | CY152783 | CY152778 | CY152781 | CY152780 | CY152779 | CY152782 |
| 463 | B/Brisbane/93/2006     | CY152792 | CY152793 | CY152791 | CY152786 | CY152789 | CY152788 | CY152787 | CY152790 |

|     |                         |          |          |          |          |          |          |          |          |
|-----|-------------------------|----------|----------|----------|----------|----------|----------|----------|----------|
| 464 | B/Sydney/88/2006        | CY152800 | CY152801 | CY152799 | CY152794 | CY152797 | CY152796 | CY152795 | CY152798 |
| 465 | B/Brisbane/95/2006      | CY152808 | CY152809 | CY152807 | CY152802 | CY152805 | CY152804 | CY152803 | CY152806 |
| 466 | B/Brisbane/2/2007       | CY149923 | CY149924 | CY149922 | CY149917 | CY149920 | CY149919 | CY149918 | CY149921 |
| 467 | B/Brisbane/4/2007       | CY152816 | CY152817 | CY152815 | CY152810 | CY152813 | CY152812 | CY152811 | CY152814 |
| 468 | B/Brisbane/5/2007       | CY152824 | CY152825 | CY152823 | CY152818 | CY152821 | CY152820 | CY152819 | CY152822 |
| 469 | B/Brisbane/6/2007       | CY152832 | CY152833 | CY152831 | CY152826 | CY152829 | CY152828 | CY152827 | CY152830 |
| 470 | B/Brisbane/7/2006       | CY152840 | CY152841 | CY152839 | CY152834 | CY152837 | CY152836 | CY152835 | CY152838 |
| 471 | B/Christchurch/16/2007  | CY152848 | CY152849 | CY152847 | CY152842 | CY152845 | CY152844 | CY152843 | CY152846 |
| 472 | B/Victoria/500/2007     | CY149931 | CY149932 | CY149930 | CY149925 | CY149928 | CY149927 | CY149926 | CY149929 |
| 473 | B/Brisbane/7/2007       | CY152856 | CY152857 | CY152855 | CY152850 | CY152853 | CY152852 | CY152851 | CY152854 |
| 474 | B/Victoria/206/2007     | CY152864 | CY152865 | CY152863 | CY152858 | CY152861 | CY152860 | CY152859 | CY152862 |
| 475 | B/Victoria/210/2007     | CY152872 | CY152873 | CY152871 | CY152866 | CY152869 | CY152868 | CY152867 | CY152870 |
| 476 | B/Victoria/207/2007     | CY152880 | CY152881 | CY152879 | CY152874 | CY152877 | CY152876 | CY152875 | CY152878 |
| 477 | B/Brisbane/10/2007      | CY152888 | CY152889 | CY152887 | CY152882 | CY152885 | CY152884 | CY152883 | CY152886 |
| 478 | B/Sydney/300/2007       | CY152896 | CY152897 | CY152895 | CY152890 | CY152893 | CY152892 | CY152891 | CY152894 |
| 479 | B/Brisbane/11/2007      | CY152904 | CY152905 | CY152903 | CY152898 | CY152901 | CY152900 | CY152899 | CY152902 |
| 480 | B/Dunedin/1/2002        | CY151423 | CY151424 | CY151422 | CY151417 | CY151420 | CY151419 | CY151418 | CY151421 |
| 481 | B/Victoria/162/2002     | CY151431 | CY151432 | CY151430 | CY151425 | CY151428 | CY151427 | CY151426 | CY151429 |
| 482 | B/Brisbane/59/2002      | CY151439 | CY151440 | CY151438 | CY151433 | CY151436 | CY151435 | CY151434 | CY151437 |
| 483 | B/Townsville/9/2002     | CY151447 | CY151448 | CY151446 | CY151441 | CY151444 | CY151443 | CY151442 | CY151445 |
| 484 | B/Sydney/86/2002        | CY151455 | CY151456 | CY151454 | CY151449 | CY151452 | CY151451 | CY151450 | CY151453 |
| 485 | B/Christchurch/86/2002  | CY151463 | CY151464 | CY151462 | CY151457 | CY151460 | CY151459 | CY151458 | CY151461 |
| 486 | B/Christchurch/111/2002 | CY151471 | CY151472 | CY151470 | CY151465 | CY151468 | CY151467 | CY151466 | CY151469 |
| 487 | B/Victoria/413/2002     | CY149802 | CY149803 | CY149801 | CY149796 | CY149799 | CY149798 | CY149797 | CY149800 |
| 488 | B/Victoria/412/2002     | CY151479 | CY151480 | CY151478 | CY151473 | CY151476 | CY151475 | CY151474 | CY151477 |
| 489 | B/Christchurch/90/2002  | CY151487 | CY151488 | CY151486 | CY151481 | CY151484 | CY151483 | CY151482 | CY151485 |
| 490 | B/Wellington/7/2002     | CY151495 | CY151496 | CY151494 | CY151489 | CY151492 | CY151491 | CY151490 | CY151493 |
| 491 | B/Waikato/15/2002       | CY149810 | CY149811 | CY149809 | CY149804 | CY149807 | CY149806 | CY149805 | CY149808 |
| 492 | B/Townsville/11/2002    | CY151503 | CY151504 | CY151502 | CY151497 | CY151500 | CY151499 | CY151498 | CY151501 |
| 493 | B/Brisbane/72/2002      | CY151511 | CY151512 | CY151510 | CY151505 | CY151508 | CY151507 | CY151506 | CY151509 |
| 494 | B/Townsville/16/2002    | CY151519 | CY151520 | CY151518 | CY151513 | CY151516 | CY151515 | CY151514 | CY151517 |
| 495 | B/Waikato/20/2002       | CY149818 | CY149819 | CY149817 | CY149812 | CY149815 | CY149814 | CY149813 | CY149816 |
| 496 | B/Christchurch/118/2002 | CY151527 | CY151528 | CY151526 | CY151521 | CY151524 | CY151523 | CY151522 | CY151525 |
| 497 | B/Auckland/35/2002      | CY151535 | CY151536 | CY151534 | CY151529 | CY151532 | CY151531 | CY151530 | CY151533 |
| 498 | B/Christchurch/119/2002 | CY151543 | CY151544 | CY151542 | CY151537 | CY151540 | CY151539 | CY151538 | CY151541 |
| 499 | B/Waikato/22/2002       | CY149826 | CY149827 | CY149825 | CY149820 | CY149823 | CY149822 | CY149821 | CY149824 |
| 500 | B/Brisbane/74/2002      | CY151551 | CY151552 | CY151550 | CY151545 | CY151548 | CY151547 | CY151546 | CY151549 |
| 501 | B/Sydney/504/2007       | CY152912 | CY152913 | CY152911 | CY152906 | CY152909 | CY152908 | CY152907 | CY152910 |
| 502 | B/Brisbane/15/2007      | CY149939 | CY149940 | CY149938 | CY149933 | CY149936 | CY149935 | CY149934 | CY149937 |
| 503 | B/Sydney/111/2007       | CY152920 | CY152921 | CY152919 | CY152914 | CY152917 | CY152916 | CY152915 | CY152918 |
| 504 | B/Sydney/505/2007       | CY152928 | CY152929 | CY152927 | CY152922 | CY152925 | CY152924 | CY152923 | CY152926 |
| 505 | B/Brisbane/20/2007      | CY149947 | CY149948 | CY149946 | CY149941 | CY149944 | CY149943 | CY149942 | CY149945 |
| 506 | B/Brisbane/13/2007      | CY152936 | CY152937 | CY152935 | CY152930 | CY152933 | CY152932 | CY152931 | CY152934 |
| 507 | B/Victoria/217/2007     | CY152944 | CY152945 | CY152943 | CY152938 | CY152941 | CY152940 | CY152939 | CY152942 |
| 508 | B/Brisbane/22/2007      | CY149955 | CY149956 | CY149954 | CY149949 | CY149952 | CY149951 | CY149950 | CY149953 |
| 509 | B/Auckland/6/2008       | CY152952 | CY152953 | CY152951 | CY152946 | CY152949 | CY152948 | CY152947 | CY152950 |
| 510 | B/Sydney/55/2008        | CY152960 | CY152961 | CY152959 | CY152954 | CY152957 | CY152956 | CY152955 | CY152958 |
| 511 | B/Sydney/56/2008        | CY152968 | CY152969 | CY152967 | CY152962 | CY152965 | CY152964 | CY152963 | CY152966 |
| 512 | B/Auckland/10/2008      | CY149963 | CY149964 | CY149962 | CY149957 | CY149960 | CY149959 | CY149958 | CY149961 |
| 513 | B/Sydney/57/2008        | CY152976 | CY152977 | CY152975 | CY152970 | CY152973 | CY152972 | CY152971 | CY152974 |
| 514 | B/Wellington/7/2008     | CY149971 | CY149972 | CY149970 | CY149965 | CY149968 | CY149967 | CY149966 | CY149969 |
| 515 | B/Sydney/58/2008        | CY152984 | CY152985 | CY152983 | CY152978 | CY152981 | CY152980 | CY152979 | CY152982 |
| 516 | B/Sydney/59/2008        | CY152992 | CY152993 | CY152991 | CY152986 | CY152989 | CY152988 | CY152987 | CY152990 |
| 517 | B/Auckland/23/2008      | CY153000 | CY153001 | CY152999 | CY152994 | CY152997 | CY152996 | CY152995 | CY152998 |
| 518 | B/Brisbane/45/2008      | CY149979 | CY149980 | CY149978 | CY149973 | CY149976 | CY149975 | CY149974 | CY149977 |

|     |                        |          |          |          |          |          |          |          |          |
|-----|------------------------|----------|----------|----------|----------|----------|----------|----------|----------|
| 519 | B/Brisbane/33/2008     | CY149987 | CY149989 | CY149986 | CY149981 | CY149984 | CY149983 | CY149982 | CY149985 |
| 520 | B/Sydney/89/2008       | CY153008 | CY153009 | CY153007 | CY153002 | CY153005 | CY153004 | CY153003 | CY153006 |
| 521 | B/Auckland/36/2008     | CY153016 | CY153017 | CY153015 | CY153010 | CY153013 | CY153012 | CY153011 | CY153014 |
| 522 | B/Wellington/14/2008   | CY153024 | CY153025 | CY153023 | CY153018 | CY153021 | CY153020 | CY153019 | CY153022 |
| 523 | B/Sydney/12/2008       | CY153032 | CY153033 | CY153031 | CY153026 | CY153029 | CY153028 | CY153027 | CY153030 |
| 524 | B/Auckland/48/2008     | CY149997 | CY149998 | CY149996 | CY149991 | CY149994 | CY149993 | CY149992 | CY149995 |
| 525 | B/Sydney/65/2008       | CY153040 | CY153041 | CY153039 | CY153034 | CY153037 | CY153036 | CY153035 | CY153038 |
| 526 | B/Wellington/16/2008   | CY150005 | CY150006 | CY150004 | CY149999 | CY150002 | CY150001 | CY150000 | CY150003 |
| 527 | B/Sydney/91/2008       | CY153048 | CY153049 | CY153047 | CY153042 | CY153045 | CY153044 | CY153043 | CY153046 |
| 528 | B/Brisbane/54/2008     | CY153056 | CY153057 | CY153055 | CY153050 | CY153053 | CY153052 | CY153051 | CY153054 |
| 529 | B/Auckland/64/2008     | CY150013 | CY150014 | CY150012 | CY150007 | CY150010 | CY150009 | CY150008 | CY150011 |
| 530 | B/Brisbane/102/2008    | CY150021 | CY150022 | CY150020 | CY150015 | CY150018 | CY150017 | CY150016 | CY150019 |
| 531 | B/Wellington/17/2008   | CY153064 | CY153065 | CY153063 | CY153058 | CY153061 | CY153060 | CY153059 | CY153062 |
| 532 | B/Sydney/2002/2008     | CY153072 | CY153073 | CY153071 | CY153066 | CY153069 | CY153068 | CY153067 | CY153070 |
| 533 | B/Brisbane/55/2008     | CY153080 | CY153081 | CY153079 | CY153074 | CY153077 | CY153076 | CY153075 | CY153078 |
| 534 | B/Brisbane/138/2008    | CY153088 | CY153089 | CY153087 | CY153082 | CY153085 | CY153084 | CY153083 | CY153086 |
| 535 | B/Brisbane/79/2008     | CY153096 | CY153097 | CY153095 | CY153090 | CY153093 | CY153092 | CY153091 | CY153094 |
| 536 | B/Sydney/27/2008       | CY153104 | CY153105 | CY153103 | CY153098 | CY153101 | CY153100 | CY153099 | CY153102 |
| 537 | B/Christchurch/18/2008 | CY150029 | CY150030 | CY150028 | CY150023 | CY150026 | CY150025 | CY150024 | CY150027 |
| 538 | B/Auckland/91/2008     | CY153112 | CY153113 | CY153111 | CY153106 | CY153109 | CY153108 | CY153107 | CY153110 |
| 539 | B/Townsville/1/2008    | CY153120 | CY153121 | CY153119 | CY153114 | CY153117 | CY153116 | CY153115 | CY153118 |
| 540 | B/Sydney/95/2008       | CY153128 | CY153129 | CY153127 | CY153122 | CY153125 | CY153124 | CY153123 | CY153126 |
| 541 | B/Wellington/25/2008   | CY153136 | CY153137 | CY153135 | CY153130 | CY153133 | CY153132 | CY153131 | CY153134 |
| 542 | B/Brisbane/101/2008    | CY150037 | CY150038 | CY150036 | CY150031 | CY150034 | CY150033 | CY150032 | CY150035 |
| 543 | B/Victoria/210/2008    | CY153144 | CY153145 | CY153143 | CY153138 | CY153141 | CY153140 | CY153139 | CY153142 |
| 544 | B/Townsville/2/2008    | CY153152 | CY153153 | CY153151 | CY153146 | CY153149 | CY153148 | CY153147 | CY153150 |
| 545 | B/Sydney/521/2008      | CY153160 | CY153161 | CY153159 | CY153154 | CY153157 | CY153156 | CY153155 | CY153158 |
| 546 | B/Townsville/101/2008  | CY150045 | CY150046 | CY150044 | CY150039 | CY150042 | CY150041 | CY150040 | CY150043 |
| 547 | B/Sydney/21/2008       | CY153168 | CY153169 | CY153167 | CY153162 | CY153165 | CY153164 | CY153163 | CY153166 |
| 548 | B/Auckland/106/2008    | CY150053 | CY150054 | CY150052 | CY150047 | CY150050 | CY150049 | CY150048 | CY150051 |
| 549 | B/Brisbane/100/2008    | CY153176 | CY153177 | CY153175 | CY153170 | CY153173 | CY153172 | CY153171 | CY153174 |
| 550 | B/Sydney/23/2008       | CY150061 | CY150063 | CY150060 | CY150055 | CY150058 | CY150057 | CY150056 | CY150059 |
| 551 | B/Auckland/117/2008    | CY153184 | CY153185 | CY153183 | CY153178 | CY153181 | CY153180 | CY153179 | CY153182 |
| 552 | B/Brisbane/122/2008    | CY153192 | CY153193 | CY153191 | CY153186 | CY153189 | CY153188 | CY153187 | CY153190 |
| 553 | B/Victoria/506/2008    | CY153200 | CY153201 | CY153199 | CY153194 | CY153197 | CY153196 | CY153195 | CY153198 |
| 554 | B/Sydney/525/2008      | CY153208 | CY153209 | CY153207 | CY153202 | CY153205 | CY153204 | CY153203 | CY153206 |
| 555 | B/Wellington/30/2008   | CY150070 | CY150071 | CY150069 | CY150064 | CY150067 | CY150066 | CY150065 | CY150068 |
| 556 | B/Victoria/508/2008    | CY153216 | CY153217 | CY153215 | CY153210 | CY153213 | CY153212 | CY153211 | CY153214 |
| 557 | B/Brisbane/121/2008    | CY153224 | CY153225 | CY153223 | CY153218 | CY153221 | CY153220 | CY153219 | CY153222 |
| 558 | B/Auckland/124/2008    | CY153232 | CY153233 | CY153231 | CY153226 | CY153229 | CY153228 | CY153227 | CY153230 |
| 559 | B/Brisbane/119/2008    | CY153240 | CY153241 | CY153239 | CY153234 | CY153237 | CY153236 | CY153235 | CY153238 |
| 560 | B/Victoria/509/2008    | CY150078 | CY150079 | CY150077 | CY150072 | CY150075 | CY150074 | CY150073 | CY150076 |
| 561 | B/Victoria/511/2008    | CY153248 | CY153249 | CY153247 | CY153242 | CY153245 | CY153244 | CY153243 | CY153246 |
| 562 | B/Brisbane/120/2008    | CY153256 | CY153257 | CY153255 | CY153250 | CY153253 | CY153252 | CY153251 | CY153254 |
| 563 | B/Auckland/131/2008    | CY150086 | CY150087 | CY150085 | CY150080 | CY150083 | CY150082 | CY150081 | CY150084 |
| 564 | B/Victoria/513/2008    | CY153264 | CY153265 | CY153263 | CY153258 | CY153261 | CY153260 | CY153259 | CY153262 |
| 565 | B/Sydney/37/2008       | CY150094 | CY150095 | CY150093 | CY150088 | CY150091 | CY150090 | CY150089 | CY150092 |
| 566 | B/Victoria/514/2008    | CY153272 | CY153273 | CY153271 | CY153266 | CY153269 | CY153268 | CY153267 | CY153270 |
| 567 | B/Brisbane/146/2008    | CY153280 | CY153281 | CY153279 | CY153274 | CY153277 | CY153276 | CY153275 | CY153278 |
| 568 | B/Victoria/516/2008    | CY153288 | CY153289 | CY153287 | CY153282 | CY153285 | CY153284 | CY153283 | CY153286 |
| 569 | B/Victoria/517/2008    | CY153296 | CY153297 | CY153295 | CY153290 | CY153293 | CY153292 | CY153291 | CY153294 |
| 570 | B/Auckland/144/2008    | CY150102 | CY150103 | CY150101 | CY150096 | CY150099 | CY150098 | CY150097 | CY150100 |
| 571 | B/Sydney/538/2008      | CY153304 | CY153305 | CY153303 | CY153298 | CY153301 | CY153300 | CY153299 | CY153302 |
| 572 | B/Victoria/521/2008    | CY153312 | CY153313 | CY153311 | CY153306 | CY153309 | CY153308 | CY153307 | CY153310 |
| 573 | B/Victoria/520/2008    | CY153320 | CY153321 | CY153319 | CY153314 | CY153317 | CY153316 | CY153315 | CY153318 |

|     |                          |          |          |          |          |          |          |          |          |
|-----|--------------------------|----------|----------|----------|----------|----------|----------|----------|----------|
| 574 | B/Sydney/539/2008        | CY153328 | CY153329 | CY153327 | CY153322 | CY153325 | CY153324 | CY153323 | CY153326 |
| 575 | B/Christchurch/104/2008  | CY150110 | CY150112 | CY150109 | CY150104 | CY150107 | CY150106 | CY150105 | CY150108 |
| 576 | B/Sydney/543/2008        | CY153336 | CY153337 | CY153335 | CY153330 | CY153333 | CY153332 | CY153331 | CY153334 |
| 577 | B/Auckland/84/2008       | CY153344 | CY153345 | CY153343 | CY153338 | CY153341 | CY153340 | CY153339 | CY153342 |
| 578 | B/Sydney/84/2008         | CY153352 | CY153353 | CY153351 | CY153346 | CY153349 | CY153348 | CY153347 | CY153350 |
| 579 | B/Sydney/548/2008        | CY153360 | CY153361 | CY153359 | CY153354 | CY153357 | CY153356 | CY153355 | CY153358 |
| 580 | B/Brisbane/171/2008      | CY153368 | CY153369 | CY153367 | CY153362 | CY153365 | CY153364 | CY153363 | CY153366 |
| 581 | B/Auckland/157/2008      | CY150119 | CY150120 | CY150118 | CY150113 | CY150116 | CY150115 | CY150114 | CY150117 |
| 582 | B/Victoria/225/2008      | CY153376 | CY153377 | CY153375 | CY153370 | CY153373 | CY153372 | CY153371 | CY153374 |
| 583 | B/Sydney/49/2008         | CY150127 | CY150128 | CY150126 | CY150121 | CY150124 | CY150123 | CY150122 | CY150125 |
| 584 | B/Auckland/158/2008      | CY150135 | CY150137 | CY150134 | CY150129 | CY150132 | CY150131 | CY150130 | CY150133 |
| 585 | B/Brisbane/167/2008      | CY150144 | CY150145 | CY150143 | CY150138 | CY150141 | CY150140 | CY150139 | CY150142 |
| 586 | B/Townsville/202/2008    | CY153384 | CY153385 | CY153383 | CY153378 | CY153381 | CY153380 | CY153379 | CY153382 |
| 587 | B/Sydney/110/2008        | CY150152 | CY150153 | CY150151 | CY150146 | CY150149 | CY150148 | CY150147 | CY150150 |
| 588 | B/Christchurch/179/2008  | CY150160 | CY150161 | CY150159 | CY150154 | CY150157 | CY150156 | CY150155 | CY150158 |
| 589 | B/Townsville/4/2008      | CY153392 | CY153393 | CY153391 | CY153386 | CY153389 | CY153388 | CY153387 | CY153390 |
| 590 | B/Brisbane/165/2008      | CY150168 | CY150169 | CY150167 | CY150162 | CY150165 | CY150164 | CY150163 | CY150166 |
| 591 | B/Sydney/114/2008        | CY153400 | CY153401 | CY153399 | CY153394 | CY153397 | CY153396 | CY153395 | CY153398 |
| 592 | B/Victoria/226/2008      | CY153408 | CY153409 | CY153407 | CY153402 | CY153405 | CY153404 | CY153403 | CY153406 |
| 593 | B/Townsville/5/2008      | CY153416 | CY153417 | CY153415 | CY153410 | CY153413 | CY153412 | CY153411 | CY153414 |
| 594 | B/Townsville/6/2008      | CY153424 | CY153425 | CY153423 | CY153418 | CY153421 | CY153420 | CY153419 | CY153422 |
| 595 | B/Brisbane/163/2008      | CY153432 | CY153433 | CY153431 | CY153426 | CY153429 | CY153428 | CY153427 | CY153430 |
| 596 | B/Sydney/2/2009          | CY153440 | CY153441 | CY153439 | CY153434 | CY153437 | CY153436 | CY153435 | CY153438 |
| 597 | B/Sydney/1/2009          | CY150176 | CY150177 | CY150175 | CY150170 | CY150173 | CY150172 | CY150171 | CY150174 |
| 598 | B/Sydney/4/2009          | CY150184 | CY150185 | CY150183 | CY150178 | CY150181 | CY150180 | CY150179 | CY150182 |
| 599 | B/Sydney/3/2009          | CY153448 | CY153449 | CY153447 | CY153442 | CY153445 | CY153444 | CY153443 | CY153446 |
| 600 | B/Christchurch/1/2010    | CY153456 | CY153457 | CY153455 | CY153450 | CY153453 | CY153452 | CY153451 | CY153454 |
| 601 | B/Christchurch/1001/2010 | CY153464 | CY153465 | CY153463 | CY153458 | CY153461 | CY153460 | CY153459 | CY153462 |
| 602 | B/Christchurch/2/2010    | CY150192 | CY150193 | CY150191 | CY150186 | CY150189 | CY150188 | CY150187 | CY150190 |
| 603 | B/Brisbane/1/2010        | CY153472 | CY153473 | CY153471 | CY153466 | CY153469 | CY153468 | CY153467 | CY153470 |
| 604 | B/Victoria/503/2010      | CY153480 | CY153481 | CY153479 | CY153474 | CY153477 | CY153476 | CY153475 | CY153478 |
| 605 | B/Brisbane/2/2010        | CY153488 | CY153489 | CY153487 | CY153482 | CY153485 | CY153484 | CY153483 | CY153486 |
| 606 | B/Victoria/504/2010      | CY153496 | CY153497 | CY153495 | CY153490 | CY153493 | CY153492 | CY153491 | CY153494 |
| 607 | B/Brisbane/3/2010        | CY153504 | CY153505 | CY153503 | CY153498 | CY153501 | CY153500 | CY153499 | CY153502 |
| 608 | B/Sydney/201/2010        | CY153512 | CY153513 | CY153511 | CY153506 | CY153509 | CY153508 | CY153507 | CY153510 |
| 609 | B/Sydney/202/2010        | CY153520 | CY153521 | CY153519 | CY153514 | CY153517 | CY153516 | CY153515 | CY153518 |
| 610 | B/Brisbane/4/2010        | CY153528 | CY153529 | CY153527 | CY153522 | CY153525 | CY153524 | CY153523 | CY153526 |
| 611 | B/Victoria/506/2010      | CY153536 | CY153537 | CY153535 | CY153530 | CY153533 | CY153532 | CY153531 | CY153534 |
| 612 | B/Victoria/507/2010      | CY153544 | CY153545 | CY153543 | CY153538 | CY153541 | CY153540 | CY153539 | CY153542 |
| 613 | B/Brisbane/6/2010        | CY150200 | CY150201 | CY150199 | CY150194 | CY150197 | CY150196 | CY150195 | CY150198 |
| 614 | B/Brisbane/9/2010        | CY153552 | CY153553 | CY153551 | CY153546 | CY153549 | CY153548 | CY153547 | CY153550 |
| 615 | B/Brisbane/8/2010        | CY153560 | CY153561 | CY153559 | CY153554 | CY153557 | CY153556 | CY153555 | CY153558 |
| 616 | B/Sydney/500/2010        | CY153568 | CY153569 | CY153567 | CY153562 | CY153565 | CY153564 | CY153563 | CY153566 |
| 617 | B/Sydney/501/2010        | CY153576 | CY153577 | CY153575 | CY153570 | CY153573 | CY153572 | CY153571 | CY153574 |
| 618 | B/Sydney/205/2010        | CY153584 | CY153585 | CY153583 | CY153578 | CY153581 | CY153580 | CY153579 | CY153582 |
| 619 | B/Townsville/1/2010      | CY153592 | CY153593 | CY153591 | CY153586 | CY153589 | CY153588 | CY153587 | CY153590 |
| 620 | B/Victoria/508/2010      | CY153600 | CY153601 | CY153599 | CY153594 | CY153597 | CY153596 | CY153595 | CY153598 |
| 621 | B/Sydney/5/2010          | CY153608 | CY153609 | CY153607 | CY153602 | CY153605 | CY153604 | CY153603 | CY153606 |
| 622 | B/Brisbane/11/2010       | CY153616 | CY153617 | CY153615 | CY153610 | CY153613 | CY153612 | CY153611 | CY153614 |
| 623 | B/Victoria/800/2010      | CY153624 | CY153625 | CY153623 | CY153618 | CY153621 | CY153620 | CY153619 | CY153622 |
| 624 | B/Victoria/509/2010      | CY153632 | CY153633 | CY153631 | CY153626 | CY153629 | CY153628 | CY153627 | CY153630 |
| 625 | B/Brisbane/16/2010       | CY153640 | CY153641 | CY153639 | CY153634 | CY153637 | CY153636 | CY153635 | CY153638 |
| 626 | B/Sydney/503/2010        | CY153648 | CY153649 | CY153647 | CY153642 | CY153645 | CY153644 | CY153643 | CY153646 |
| 627 | B/Sydney/504/2010        | CY150208 | CY150209 | CY150207 | CY150202 | CY150205 | CY150204 | CY150203 | CY150206 |
| 628 | B/Sydney/204/2010        | CY153656 | CY153657 | CY153655 | CY153650 | CY153653 | CY153652 | CY153651 | CY153654 |

|     |                         |          |          |          |          |          |          |          |          |
|-----|-------------------------|----------|----------|----------|----------|----------|----------|----------|----------|
| 629 | B/Sydney/206/2010       | CY153664 | CY153665 | CY153663 | CY153658 | CY153661 | CY153660 | CY153659 | CY153662 |
| 630 | B/Brisbane/19/2010      | CY150216 | CY150217 | CY150215 | CY150210 | CY150213 | CY150212 | CY150211 | CY150214 |
| 631 | B/Sydney/505/2010       | CY153672 | CY153673 | CY153671 | CY153666 | CY153669 | CY153668 | CY153667 | CY153670 |
| 632 | B/Brisbane/25/2010      | CY150224 | CY150225 | CY150223 | CY150218 | CY150221 | CY150220 | CY150219 | CY150222 |
| 633 | B/Sydney/207/2010       | CY150232 | CY150233 | CY150231 | CY150226 | CY150229 | CY150228 | CY150227 | CY150230 |
| 634 | B/Sydney/3/2010         | CY153680 | CY153681 | CY153679 | CY153674 | CY153677 | CY153676 | CY153675 | CY153678 |
| 635 | B/Sydney/506/2010       | CY153688 | CY153689 | CY153687 | CY153682 | CY153685 | CY153684 | CY153683 | CY153686 |
| 636 | B/Sydney/4/2010         | CY153696 | CY153697 | CY153695 | CY153690 | CY153693 | CY153692 | CY153691 | CY153694 |
| 637 | B/Sydney/208/2010       | CY153704 | CY153705 | CY153703 | CY153698 | CY153701 | CY153700 | CY153699 | CY153702 |
| 638 | B/Sydney/508/2010       | CY153712 | CY153713 | CY153711 | CY153706 | CY153709 | CY153708 | CY153707 | CY153710 |
| 639 | B/Brisbane/24/2010      | CY153720 | CY153721 | CY153719 | CY153714 | CY153717 | CY153716 | CY153715 | CY153718 |
| 640 | B/Sydney/509/2010       | CY153728 | CY153729 | CY153727 | CY153722 | CY153725 | CY153724 | CY153723 | CY153726 |
| 641 | B/Townsville/4/2010     | CY150240 | CY150241 | CY150239 | CY150234 | CY150237 | CY150236 | CY150235 | CY150238 |
| 642 | B/Sydney/6/2010         | CY153736 | CY153737 | CY153735 | CY153730 | CY153733 | CY153732 | CY153731 | CY153734 |
| 643 | B/Sydney/507/2010       | CY153744 | CY153745 | CY153743 | CY153738 | CY153741 | CY153740 | CY153739 | CY153742 |
| 644 | B/Brisbane/26/2010      | CY150248 | CY150249 | CY150247 | CY150242 | CY150245 | CY150244 | CY150243 | CY150246 |
| 645 | B/Sydney/7/2010         | CY153752 | CY153753 | CY153751 | CY153746 | CY153749 | CY153748 | CY153747 | CY153750 |
| 646 | B/Townsville/5/2010     | CY153760 | CY153761 | CY153759 | CY153754 | CY153757 | CY153756 | CY153755 | CY153758 |
| 647 | B/Brisbane/28/2010      | CY153768 | CY153769 | CY153767 | CY153762 | CY153765 | CY153764 | CY153763 | CY153766 |
| 648 | B/Brisbane/31/2010      | CY153776 | CY153777 | CY153775 | CY153770 | CY153773 | CY153772 | CY153771 | CY153774 |
| 649 | B/Sydney/1/2010         | CY153784 | CY153785 | CY153783 | CY153778 | CY153781 | CY153780 | CY153779 | CY153782 |
| 650 | B/Brisbane/33/2010      | CY153792 | CY153793 | CY153791 | CY153786 | CY153789 | CY153788 | CY153787 | CY153790 |
| 651 | B/Victoria/661/2010     | CY153800 | CY153801 | CY153799 | CY153794 | CY153797 | CY153796 | CY153795 | CY153798 |
| 652 | B/Sydney/2/2010         | CY153808 | CY153809 | CY153807 | CY153802 | CY153805 | CY153804 | CY153803 | CY153806 |
| 653 | B/Brisbane/34/2010      | CY153816 | CY153817 | CY153815 | CY153810 | CY153813 | CY153812 | CY153811 | CY153814 |
| 654 | B/Brisbane/39/2010      | CY150256 | CY150258 | CY150255 | CY150250 | CY150253 | CY150252 | CY150251 | CY150254 |
| 655 | B/Brisbane/37/2010      | CY150265 | CY150266 | CY150264 | CY150259 | CY150262 | CY150261 | CY150260 | CY150263 |
| 656 | B/Brisbane/38/2010      | CY153824 | CY153825 | CY153823 | CY153818 | CY153821 | CY153820 | CY153819 | CY153822 |
| 657 | B/Victoria/512/2010     | CY153832 | CY153833 | CY153831 | CY153826 | CY153829 | CY153828 | CY153827 | CY153830 |
| 658 | B/Sydney/10/2010        | CY153840 | CY153841 | CY153839 | CY153834 | CY153837 | CY153836 | CY153835 | CY153838 |
| 659 | B/Brisbane/40/2010      | CY150273 | CY150274 | CY150272 | CY150267 | CY150270 | CY150269 | CY150268 | CY150271 |
| 660 | B/Brisbane/41/2010      | CY153848 | CY153849 | CY153847 | CY153842 | CY153845 | CY153844 | CY153843 | CY153846 |
| 661 | B/Sydney/512/2010       | CY153856 | CY153857 | CY153855 | CY153850 | CY153853 | CY153852 | CY153851 | CY153854 |
| 662 | B/Brisbane/2/2011       | CY153864 | CY153865 | CY153863 | CY153858 | CY153861 | CY153860 | CY153859 | CY153862 |
| 663 | B/Townsville/1/2011     | CY153872 | CY153873 | CY153871 | CY153866 | CY153869 | CY153868 | CY153867 | CY153870 |
| 664 | B/Brisbane/4/2011       | CY153880 | CY153881 | CY153879 | CY153874 | CY153877 | CY153876 | CY153875 | CY153878 |
| 665 | B/Victoria/501/2011     | CY153888 | CY153889 | CY153887 | CY153882 | CY153885 | CY153884 | CY153883 | CY153886 |
| 666 | B/Brisbane/6/2011       | CY153896 | CY153897 | CY153895 | CY153890 | CY153893 | CY153892 | CY153891 | CY153894 |
| 667 | B/South Auckland/1/2011 | CY153904 | CY153905 | CY153903 | CY153898 | CY153901 | CY153900 | CY153899 | CY153902 |
| 668 | B/Sydney/4/2011         | CY153912 | CY153913 | CY153911 | CY153906 | CY153909 | CY153908 | CY153907 | CY153910 |
| 669 | B/Brisbane/10/2011      | CY150281 | CY150282 | CY150280 | CY150275 | CY150278 | CY150277 | CY150276 | CY150279 |
| 670 | B/Brisbane/13/2011      | CY153920 | CY153921 | CY153919 | CY153914 | CY153917 | CY153916 | CY153915 | CY153918 |
| 671 | B/Sydney/47/2011        | CY150289 | CY150290 | CY150288 | CY150283 | CY150286 | CY150285 | CY150284 | CY150287 |
| 672 | B/Brisbane/14/2011      | CY153928 | CY153929 | CY153927 | CY153922 | CY153925 | CY153924 | CY153923 | CY153926 |
| 673 | B/Brisbane/15/2011      | CY153936 | CY153937 | CY153935 | CY153930 | CY153933 | CY153932 | CY153931 | CY153934 |
| 674 | B/South Auckland/2/2011 | CY150297 | CY150298 | CY150296 | CY150291 | CY150294 | CY150293 | CY150292 | CY150295 |
| 675 | B/Sydney/6/2011         | CY153944 | CY153945 | CY153943 | CY153938 | CY153941 | CY153940 | CY153939 | CY153942 |
| 676 | B/Townsville/4/2011     | CY153952 | CY153953 | CY153951 | CY153946 | CY153949 | CY153948 | CY153947 | CY153950 |
| 677 | B/South Auckland/3/2011 | CY153960 | CY153961 | CY153959 | CY153954 | CY153957 | CY153956 | CY153955 | CY153958 |
| 678 | B/Sydney/8/2011         | CY153968 | CY153969 | CY153967 | CY153962 | CY153965 | CY153964 | CY153963 | CY153966 |
| 679 | B/Sydney/9/2011         | CY153976 | CY153977 | CY153975 | CY153970 | CY153973 | CY153972 | CY153971 | CY153974 |
| 680 | B/Townsville/5/2011     | CY150305 | CY150306 | CY150304 | CY150299 | CY150302 | CY150301 | CY150300 | CY150303 |
| 681 | B/Sydney/501/2011       | CY153984 | CY153985 | CY153983 | CY153978 | CY153981 | CY153980 | CY153979 | CY153982 |
| 682 | B/Victoria/503/2011     | CY153992 | CY153993 | CY153991 | CY153986 | CY153989 | CY153988 | CY153987 | CY153990 |
| 683 | B/Wellington/2/2011     | CY154000 | CY154001 | CY153999 | CY153994 | CY153997 | CY153996 | CY153995 | CY153998 |

|     |                          |                                                                         |
|-----|--------------------------|-------------------------------------------------------------------------|
| 684 | B/Sydney/502/2011        | CY154008 CY154009 CY154007 CY154002 CY154005 CY154004 CY154003 CY154006 |
| 685 | B/Brisbane/18/2011       | CY154016 CY154017 CY154015 CY154010 CY154013 CY154012 CY154011 CY154014 |
| 686 | B/Auckland/7/2011        | CY154024 CY154025 CY154023 CY154018 CY154021 CY154020 CY154019 CY154022 |
| 687 | B/Brisbane/32/2011       | CY154032 CY154033 CY154031 CY154026 CY154029 CY154028 CY154027 CY154030 |
| 688 | B/Sydney/503/2011        | CY154040 CY154041 CY154039 CY154034 CY154037 CY154036 CY154035 CY154038 |
| 689 | B/Victoria/506/2011      | CY154048 CY154049 CY154047 CY154042 CY154045 CY154044 CY154043 CY154046 |
| 690 | B/Wellington/5/2011      | CY154056 CY154057 CY154055 CY154050 CY154053 CY154052 CY154051 CY154054 |
| 691 | B/Brisbane/29/2011       | CY154064 CY154065 CY154063 CY154058 CY154061 CY154060 CY154059 CY154062 |
| 692 | B/Victoria/508/2011      | CY154072 CY154073 CY154071 CY154066 CY154069 CY154068 CY154067 CY154070 |
| 693 | B/Sydney/504/2011        | CY154080 CY154081 CY154079 CY154074 CY154077 CY154076 CY154075 CY154078 |
| 694 | B/Sydney/22/2011         | CY150313 CY150314 CY150312 CY150307 CY150310 CY150309 CY150308 CY150311 |
| 695 | B/Townsville/6/2011      | CY154088 CY154089 CY154087 CY154082 CY154085 CY154084 CY154083 CY154086 |
| 696 | B/Wellington/8/2011      | CY154096 CY154097 CY154095 CY154090 CY154093 CY154092 CY154091 CY154094 |
| 697 | B/South Auckland/12/2011 | CY150321 CY150322 CY150320 CY150315 CY150318 CY150317 CY150316 CY150319 |
| 698 | B/Victoria/509/2011      | CY154104 CY154105 CY154103 CY154098 CY154101 CY154100 CY154099 CY154102 |
| 699 | B/Waikato/7/2011         | CY150329 CY150330 CY150328 CY150323 CY150326 CY150325 CY150324 CY150327 |
| 700 | B/Sydney/12/2011         | CY154112 CY154113 CY154111 CY154106 CY154109 CY154108 CY154107 CY154110 |
| 701 | B/Christchurch/101/2011  | CY154120 CY154121 CY154119 CY154114 CY154117 CY154116 CY154115 CY154118 |
| 702 | B/Victoria/511/2011      | CY154128 CY154129 CY154127 CY154122 CY154125 CY154124 CY154123 CY154126 |
| 703 | B/Sydney/32/2011         | CY154136 CY154137 CY154135 CY154130 CY154133 CY154132 CY154131 CY154134 |
| 704 | B/Brisbane/54/2011       | CY150337 CY150338 CY150336 CY150331 CY150334 CY150333 CY150332 CY150335 |
| 705 | B/Waikato/13/2011        | CY154144 CY154145 CY154143 CY154138 CY154141 CY154140 CY154139 CY154142 |
| 706 | B/Auckland/27/2011       | CY154152 CY154153 CY154151 CY154146 CY154149 CY154148 CY154147 CY154150 |
| 707 | B/Victoria/4/2011        | CY154160 CY154161 CY154159 CY154154 CY154157 CY154156 CY154155 CY154158 |
| 708 | B/Waikato/10/2011        | CY154168 CY154169 CY154167 CY154162 CY154165 CY154164 CY154163 CY154166 |
| 709 | B/Townsville/8/2011      | CY154176 CY154177 CY154175 CY154170 CY154173 CY154172 CY154171 CY154174 |
| 710 | B/Sydney/200/2011        | CY154184 CY154185 CY154183 CY154178 CY154181 CY154180 CY154179 CY154182 |
| 711 | B/Wellington/26/2011     | CY154192 CY154193 CY154191 CY154186 CY154189 CY154188 CY154187 CY154190 |
| 712 | B/Victoria/520/2011      | CY154200 CY154201 CY154199 CY154194 CY154197 CY154196 CY154195 CY154198 |
| 713 | B/Sydney/201/2011        | CY154208 CY154209 CY154207 CY154202 CY154205 CY154204 CY154203 CY154206 |
| 714 | B/Brisbane/64/2011       | CY154216 CY154217 CY154215 CY154210 CY154213 CY154212 CY154211 CY154214 |
| 715 | B/Christchurch/25/2011   | CY154224 CY154225 CY154223 CY154218 CY154221 CY154220 CY154219 CY154222 |
| 716 | B/Victoria/9/2011        | CY154232 CY154233 CY154231 CY154226 CY154229 CY154228 CY154227 CY154230 |
| 717 | B/Wellington/34/2011     | CY154240 CY154241 CY154239 CY154234 CY154237 CY154236 CY154235 CY154238 |
| 718 | B/Townsville/10/2011     | CY154248 CY154249 CY154247 CY154242 CY154245 CY154244 CY154243 CY154246 |
| 719 | B/Victoria/525/2011      | CY154256 CY154257 CY154255 CY154250 CY154253 CY154252 CY154251 CY154254 |
| 720 | B/Sydney/31/2011         | CY154264 CY154265 CY154263 CY154258 CY154261 CY154260 CY154259 CY154262 |
| 721 | B/Sydney/19/2011         | CY154272 CY154273 CY154271 CY154266 CY154269 CY154268 CY154267 CY154270 |
| 722 | B/Auckland/44/2011       | CY154280 CY154281 CY154279 CY154274 CY154277 CY154276 CY154275 CY154278 |
| 723 | B/Brisbane/70/2011       | CY150345 CY150346 CY150344 CY150339 CY150342 CY150341 CY150340 CY150343 |
| 724 | B/Victoria/17/2011       | CY154288 CY154289 CY154287 CY154282 CY154285 CY154284 CY154283 CY154286 |
| 725 | B/Townsville/15/2011     | CY154296 CY154297 CY154295 CY154290 CY154293 CY154292 CY154291 CY154294 |
| 726 | B/Sydney/206/2011        | CY154304 CY154305 CY154303 CY154298 CY154301 CY154300 CY154299 CY154302 |
| 727 | B/Victoria/531/2011      | CY154312 CY154313 CY154311 CY154306 CY154309 CY154308 CY154307 CY154310 |
| 728 | B/Auckland/53/2011       | CY154320 CY154321 CY154319 CY154314 CY154317 CY154316 CY154315 CY154318 |
| 729 | B/Brisbane/68/2011       | CY154328 CY154329 CY154327 CY154322 CY154325 CY154324 CY154323 CY154326 |
| 730 | B/Victoria/804/2011      | CY154336 CY154337 CY154335 CY154330 CY154333 CY154332 CY154331 CY154334 |
| 731 | B/Sydney/44/2011         | CY154344 CY154345 CY154343 CY154338 CY154341 CY154340 CY154339 CY154342 |
| 732 | B/Brisbane/76/2011       | CY154352 CY154353 CY154351 CY154346 CY154349 CY154348 CY154347 CY154350 |
| 733 | B/Christchurch/33/2011   | CY154360 CY154361 CY154359 CY154354 CY154357 CY154356 CY154355 CY154358 |
| 734 | B/Victoria/25/2011       | CY154368 CY154369 CY154367 CY154362 CY154365 CY154364 CY154363 CY154366 |
| 735 | B/Sydney/20/2011         | CY154376 CY154377 CY154375 CY154370 CY154373 CY154372 CY154371 CY154374 |
| 736 | B/Victoria/827/2011      | CY154384 CY154385 CY154383 CY154378 CY154381 CY154380 CY154379 CY154382 |
| 737 | B/Brisbane/84/2011       | CY154392 CY154393 CY154391 CY154386 CY154389 CY154388 CY154387 CY154390 |
| 738 | B/Christchurch/42/2011   | CY154400 CY154401 CY154399 CY154394 CY154397 CY154396 CY154395 CY154398 |

|     |                         |                                                                         |
|-----|-------------------------|-------------------------------------------------------------------------|
| 739 | B/Sydney/53/2011        | CY154408 CY154409 CY154407 CY154402 CY154405 CY154404 CY154403 CY154406 |
| 740 | B/Victoria/829/2011     | CY154416 CY154417 CY154415 CY154410 CY154413 CY154412 CY154411 CY154414 |
| 741 | B/Brisbane/94/2011      | CY154424 CY154425 CY154423 CY154418 CY154421 CY154420 CY154419 CY154422 |
| 742 | B/Victoria/38/2011      | CY154432 CY154433 CY154431 CY154426 CY154429 CY154428 CY154427 CY154430 |
| 743 | B/Brisbane/93/2011      | CY154440 CY154441 CY154439 CY154434 CY154437 CY154436 CY154435 CY154438 |
| 744 | B/Auckland/65/2011      | CY154448 CY154449 CY154447 CY154442 CY154445 CY154444 CY154443 CY154446 |
| 745 | B/Sydney/33/2011        | CY154456 CY154457 CY154455 CY154450 CY154453 CY154452 CY154451 CY154454 |
| 746 | B/Victoria/834/2011     | CY154464 CY154465 CY154463 CY154458 CY154461 CY154460 CY154459 CY154462 |
| 747 | B/Victoria/46/2011      | CY154472 CY154473 CY154471 CY154466 CY154469 CY154468 CY154467 CY154470 |
| 748 | B/Sydney/513/2011       | CY154480 CY154481 CY154479 CY154474 CY154477 CY154476 CY154475 CY154478 |
| 749 | B/Victoria/48/2011      | CY154488 CY154489 CY154487 CY154482 CY154485 CY154484 CY154483 CY154486 |
| 750 | B/Brisbane/99/2011      | CY154496 CY154497 CY154495 CY154490 CY154493 CY154492 CY154491 CY154494 |
| 751 | B/Christchurch/54/2011  | CY154504 CY154505 CY154503 CY154498 CY154501 CY154500 CY154499 CY154502 |
| 752 | B/Auckland/66/2011      | CY154512 CY154513 CY154511 CY154506 CY154509 CY154508 CY154507 CY154510 |
| 753 | B/Sydney/515/2011       | CY154520 CY154521 CY154519 CY154514 CY154517 CY154516 CY154515 CY154518 |
| 754 | B/Brisbane/108/2011     | CY154528 CY154529 CY154527 CY154522 CY154525 CY154524 CY154523 CY154526 |
| 755 | B/Victoria/842/2011     | CY154536 CY154537 CY154535 CY154530 CY154533 CY154532 CY154531 CY154534 |
| 756 | B/Auckland/71/2011      | CY154544 CY154545 CY154543 CY154538 CY154541 CY154540 CY154539 CY154542 |
| 757 | B/Sydney/516/2011       | CY154552 CY154553 CY154551 CY154546 CY154549 CY154548 CY154547 CY154550 |
| 758 | B/Townsville/26/2011    | CY154560 CY154561 CY154559 CY154554 CY154557 CY154556 CY154555 CY154558 |
| 759 | B/Victoria/54/2011      | CY154568 CY154569 CY154567 CY154562 CY154565 CY154564 CY154563 CY154566 |
| 760 | B/Brisbane/111/2011     | CY150353 CY150354 CY150352 CY150347 CY150350 CY150349 CY150348 CY150351 |
| 761 | B/Victoria/855/2011     | CY154576 CY154577 CY154575 CY154570 CY154573 CY154572 CY154571 CY154574 |
| 762 | B/Brisbane/117/2011     | CY154584 CY154585 CY154583 CY154578 CY154581 CY154580 CY154579 CY154582 |
| 763 | B/Sydney/34/2011        | CY154592 CY154593 CY154591 CY154586 CY154589 CY154588 CY154587 CY154590 |
| 764 | B/Victoria/593/2011     | CY154600 CY154601 CY154599 CY154594 CY154597 CY154596 CY154595 CY154598 |
| 765 | B/Auckland/73/2011      | CY154608 CY154609 CY154607 CY154602 CY154605 CY154604 CY154603 CY154606 |
| 766 | B/Brisbane/119/2011     | CY154616 CY154617 CY154615 CY154610 CY154613 CY154612 CY154611 CY154614 |
| 767 | B/Brisbane/124/2011     | CY154624 CY154625 CY154623 CY154618 CY154621 CY154620 CY154619 CY154622 |
| 768 | B/Victoria/859/2011     | CY154632 CY154633 CY154631 CY154626 CY154629 CY154628 CY154627 CY154630 |
| 769 | B/Sydney/1/2002         | CY150831 CY150832 CY150830 CY150825 CY150828 CY150827 CY150826 CY150829 |
| 770 | B/Sydney/2/2002         | CY150839 CY150840 CY150838 CY150833 CY150836 CY150835 CY150834 CY150837 |
| 771 | B/Sydney/6/2002         | CY150847 CY150848 CY150846 CY150841 CY150844 CY150843 CY150842 CY150845 |
| 772 | B/Sydney/202/2002       | CY150855 CY150856 CY150854 CY150849 CY150852 CY150851 CY150850 CY150853 |
| 773 | B/Sydney/9/2002         | CY150863 CY150864 CY150862 CY150857 CY150860 CY150859 CY150858 CY150861 |
| 774 | B/Sydney/200/2002       | CY154640 CY154641 CY154639 CY154634 CY154637 CY154636 CY154635 CY154638 |
| 775 | B/Sydney/201/2002       | CY154648 CY154649 CY154647 CY154642 CY154645 CY154644 CY154643 CY154646 |
| 776 | B/Sydney/3/2002         | CY154656 CY154657 CY154655 CY154650 CY154653 CY154652 CY154651 CY154654 |
| 777 | B/Victoria/341/2002     | CY154664 CY154665 CY154663 CY154658 CY154661 CY154660 CY154659 CY154662 |
| 778 | B/Victoria/108/2002     | CY154672 CY154673 CY154671 CY154666 CY154669 CY154668 CY154667 CY154670 |
| 779 | B/Victoria/143/2002     | CY154680 CY154681 CY154679 CY154674 CY154677 CY154676 CY154675 CY154678 |
| 780 | B/Victoria/142/2002     | CY154688 CY154689 CY154687 CY154682 CY154685 CY154684 CY154683 CY154686 |
| 781 | B/Victoria/353/2002     | CY154696 CY154697 CY154695 CY154690 CY154693 CY154692 CY154691 CY154694 |
| 782 | B/Victoria/500/2003     | CY154704 CY154705 CY154703 CY154698 CY154701 CY154700 CY154699 CY154702 |
| 783 | B/Townsville/1/2003     | CY154712 CY154713 CY154711 CY154706 CY154709 CY154708 CY154707 CY154710 |
| 784 | B/Christchurch/241/2004 | CY154720 CY154721 CY154719 CY154714 CY154717 CY154716 CY154715 CY154718 |
| 785 | B/Christchurch/242/2004 | CY154728 CY154729 CY154727 CY154722 CY154725 CY154724 CY154723 CY154726 |
| 786 | B/Victoria/108/2004     | CY154736 CY154737 CY154735 CY154730 CY154733 CY154732 CY154731 CY154734 |
| 787 | B/Sydney/1/2004         | CY150361 CY150362 CY150360 CY150355 CY150358 CY150357 CY150356 CY150359 |
| 788 | B/Victoria/501/2004     | CY150369 CY150370 CY150368 CY150363 CY150366 CY150365 CY150364 CY150367 |
| 789 | B/Victoria/500/2004     | CY150377 CY150378 CY150376 CY150371 CY150374 CY150373 CY150372 CY150375 |
| 790 | B/Christchurch/6/2004   | CY154744 CY154745 CY154743 CY154738 CY154741 CY154740 CY154739 CY154742 |
| 791 | B/Sydney/2/2004         | CY154752 CY154753 CY154751 CY154746 CY154749 CY154748 CY154747 CY154750 |
| 792 | B/Victoria/101/2004     | CY154760 CY154761 CY154759 CY154754 CY154757 CY154756 CY154755 CY154758 |
| 793 | B/Victoria/102/2004     | CY154768 CY154769 CY154767 CY154762 CY154765 CY154764 CY154763 CY154766 |

|     |                         |                                                                         |
|-----|-------------------------|-------------------------------------------------------------------------|
| 794 | B/Auckland/1/2004       | CY154776 CY154777 CY154775 CY154770 CY154773 CY154772 CY154771 CY154774 |
| 795 | B/Sydney/3/2004         | CY150385 CY150386 CY150384 CY150379 CY150382 CY150381 CY150380 CY150383 |
| 796 | B/Brisbane/1/2004       | CY154784 CY154785 CY154783 CY154778 CY154781 CY154780 CY154779 CY154782 |
| 797 | B/Christchurch/22/2004  | CY154792 CY154793 CY154791 CY154786 CY154789 CY154788 CY154787 CY154790 |
| 798 | B/Waikato/01/2004       | CY154800 CY154801 CY154799 CY154794 CY154797 CY154796 CY154795 CY154798 |
| 799 | B/Sydney/4/2004         | CY154808 CY154809 CY154807 CY154802 CY154805 CY154804 CY154803 CY154806 |
| 800 | B/Victoria/109/2004     | CY154816 CY154817 CY154815 CY154810 CY154813 CY154812 CY154811 CY154814 |
| 801 | B/Otago/01/2004         | CY154824 CY154825 CY154823 CY154818 CY154821 CY154820 CY154819 CY154822 |
| 802 | B/Victoria/301/2004     | CY150393 CY150394 CY150392 CY150387 CY150390 CY150389 CY150388 CY150391 |
| 803 | B/Victoria/302/2004     | CY154832 CY154833 CY154831 CY154826 CY154829 CY154828 CY154827 CY154830 |
| 804 | B/Christchurch/33/2004  | CY154840 CY154841 CY154839 CY154834 CY154837 CY154836 CY154835 CY154838 |
| 805 | B/Victoria/104/2004     | CY154848 CY154849 CY154847 CY154842 CY154845 CY154844 CY154843 CY154846 |
| 806 | B/Brisbane/2/2004       | CY154856 CY154857 CY154855 CY154850 CY154853 CY154852 CY154851 CY154854 |
| 807 | B/Brisbane/3/2004       | CY154864 CY154865 CY154863 CY154858 CY154861 CY154860 CY154859 CY154862 |
| 808 | B/Victoria/506/2004     | CY154872 CY154873 CY154871 CY154866 CY154869 CY154868 CY154867 CY154870 |
| 809 | B/Victoria/105/2004     | CY154880 CY154881 CY154879 CY154874 CY154877 CY154876 CY154875 CY154878 |
| 810 | B/Victoria/507/2004     | CY150401 CY150402 CY150400 CY150395 CY150398 CY150397 CY150396 CY150399 |
| 811 | B/Sydney/5/2004         | CY154888 CY154889 CY154887 CY154882 CY154885 CY154884 CY154883 CY154886 |
| 812 | B/Victoria/508/2004     | CY150409 CY150410 CY150408 CY150403 CY150406 CY150405 CY150404 CY150407 |
| 813 | B/Brisbane/4/2004       | CY154896 CY154897 CY154895 CY154890 CY154893 CY154892 CY154891 CY154894 |
| 814 | B/Christchurch/95/2004  | CY154904 CY154905 CY154903 CY154898 CY154901 CY154900 CY154899 CY154902 |
| 815 | B/Victoria/107/2004     | CY154912 CY154913 CY154911 CY154906 CY154909 CY154908 CY154907 CY154910 |
| 816 | B/Brisbane/7/2004       | CY154920 CY154921 CY154919 CY154914 CY154917 CY154916 CY154915 CY154918 |
| 817 | B/Wellington/01/2004    | CY154928 CY154929 CY154927 CY154922 CY154925 CY154924 CY154923 CY154926 |
| 818 | B/Brisbane/11/2004      | CY154936 CY154937 CY154935 CY154930 CY154933 CY154932 CY154931 CY154934 |
| 819 | B/Brisbane/10/2004      | CY154944 CY154945 CY154943 CY154938 CY154941 CY154940 CY154939 CY154942 |
| 820 | B/Brisbane/12/2004      | CY154952 CY154953 CY154951 CY154946 CY154949 CY154948 CY154947 CY154950 |
| 821 | B/Christchurch/407/2004 | CY150417 CY150418 CY150416 CY150411 CY150414 CY150413 CY150412 CY150415 |
| 822 | B/Sydney/203/2004       | CY154960 CY154961 CY154959 CY154954 CY154957 CY154956 CY154955 CY154958 |
| 823 | B/Brisbane/8/2004       | CY154968 CY154969 CY154967 CY154962 CY154965 CY154964 CY154963 CY154966 |
| 824 | B/Brisbane/9/2004       | CY154976 CY154977 CY154975 CY154970 CY154973 CY154972 CY154971 CY154974 |
| 825 | B/Brisbane/6/2004       | CY154984 CY154985 CY154983 CY154978 CY154981 CY154980 CY154979 CY154982 |
| 826 | B/Victoria/304/2004     | CY154992 CY154993 CY154991 CY154986 CY154989 CY154988 CY154987 CY154990 |
| 827 | B/Waikato/02/2004       | CY155000 CY155001 CY154999 CY154994 CY154997 CY154996 CY154995 CY154998 |
| 828 | B/Sydney/200/2004       | CY155008 CY155009 CY155007 CY155002 CY155005 CY155004 CY155003 CY155006 |
| 829 | B/Victoria/110/2004     | CY155016 CY155017 CY155015 CY155010 CY155013 CY155012 CY155011 CY155014 |
| 830 | B/Christchurch/188/2004 | CY150425 CY150426 CY150424 CY150419 CY150422 CY150421 CY150420 CY150423 |
| 831 | B/Sydney/201/2004       | CY155024 CY155025 CY155023 CY155018 CY155021 CY155020 CY155019 CY155022 |
| 832 | B/Brisbane/14/2004      | CY155032 CY155033 CY155031 CY155026 CY155029 CY155028 CY155027 CY155030 |
| 833 | B/Brisbane/5/2004       | CY155040 CY155041 CY155039 CY155034 CY155037 CY155036 CY155035 CY155038 |
| 834 | B/Victoria/509/2004     | CY155048 CY155049 CY155047 CY155042 CY155045 CY155044 CY155043 CY155046 |
| 835 | B/Brisbane/13/2004      | CY155056 CY155057 CY155055 CY155050 CY155053 CY155052 CY155051 CY155054 |
| 836 | B/Wellington/02/2004    | CY155064 CY155065 CY155063 CY155058 CY155061 CY155060 CY155059 CY155062 |
| 837 | B/Victoria/113/2004     | CY155072 CY155073 CY155071 CY155066 CY155069 CY155068 CY155067 CY155070 |
| 838 | B/Otago/02/2004         | CY155080 CY155081 CY155079 CY155074 CY155077 CY155076 CY155075 CY155078 |
| 839 | B/Brisbane/15/2004      | CY155088 CY155089 CY155087 CY155082 CY155085 CY155084 CY155083 CY155086 |
| 840 | B/Christchurch/289/2004 | CY155096 CY155097 CY155095 CY155090 CY155093 CY155092 CY155091 CY155094 |
| 841 | B/Victoria/305/2004     | CY155104 CY155105 CY155103 CY155098 CY155101 CY155100 CY155099 CY155102 |
| 842 | B/Victoria/513/2004     | CY155112 CY155113 CY155111 CY155106 CY155109 CY155108 CY155107 CY155110 |
| 843 | B/Waikato/03/2004       | CY155120 CY155121 CY155119 CY155114 CY155117 CY155116 CY155115 CY155118 |
| 844 | B/Sydney/202/2004       | CY155128 CY155129 CY155127 CY155122 CY155125 CY155124 CY155123 CY155126 |
| 845 | B/Wellington/04/2004    | CY155136 CY155137 CY155135 CY155130 CY155133 CY155132 CY155131 CY155134 |
| 846 | B/Wellington/05/2004    | CY155144 CY155145 CY155143 CY155138 CY155141 CY155140 CY155139 CY155142 |
| 847 | B/Otago/03/2004         | CY150433 CY150434 CY150432 CY150427 CY150430 CY150429 CY150428 CY150431 |
| 848 | B/Sydney/6/2004         | CY155152 CY155153 CY155151 CY155146 CY155149 CY155148 CY155147 CY155150 |



|     |                         |          |          |          |          |          |          |          |          |
|-----|-------------------------|----------|----------|----------|----------|----------|----------|----------|----------|
| 849 | B/Christchurch/287/2004 | CY155160 | CY155161 | CY155159 | CY155154 | CY155157 | CY155156 | CY155155 | CY155158 |
| 850 | B/Christchurch/335/2004 | CY155168 | CY155169 | CY155167 | CY155162 | CY155165 | CY155164 | CY155163 | CY155166 |
| 851 | B/Brisbane/18/2004      | CY155176 | CY155177 | CY155175 | CY155170 | CY155173 | CY155172 | CY155171 | CY155174 |
| 852 | B/Brisbane/17/2004      | CY155184 | CY155185 | CY155183 | CY155178 | CY155181 | CY155180 | CY155179 | CY155182 |
| 853 | B/Otago/04/2004         | CY150441 | CY150442 | CY150440 | CY150435 | CY150438 | CY150437 | CY150436 | CY150439 |
| 854 | B/Brisbane/19/2004      | CY155192 | CY155193 | CY155191 | CY155186 | CY155189 | CY155188 | CY155187 | CY155190 |
| 855 | B/Victoria/515/2004     | CY155200 | CY155201 | CY155199 | CY155194 | CY155197 | CY155196 | CY155195 | CY155198 |
| 856 | B/Christchurch/346/2004 | CY150449 | CY150450 | CY150448 | CY150443 | CY150446 | CY150445 | CY150444 | CY150447 |
| 857 | B/Christchurch/402/2004 | CY150457 | CY150458 | CY150456 | CY150451 | CY150454 | CY150453 | CY150452 | CY150455 |
| 858 | B/Victoria/517/2004     | CY155208 | CY155209 | CY155207 | CY155202 | CY155205 | CY155204 | CY155203 | CY155206 |
| 859 | B/Victoria/516/2004     | CY155216 | CY155217 | CY155215 | CY155210 | CY155213 | CY155212 | CY155211 | CY155214 |
| 860 | B/Brisbane/20/2004      | CY155224 | CY155225 | CY155223 | CY155218 | CY155221 | CY155220 | CY155219 | CY155222 |
| 861 | B/Brisbane/21/2004      | CY155232 | CY155233 | CY155231 | CY155226 | CY155229 | CY155228 | CY155227 | CY155230 |
| 862 | B/Victoria/519/2004     | CY155240 | CY155241 | CY155239 | CY155234 | CY155237 | CY155236 | CY155235 | CY155238 |
| 863 | B/Victoria/518/2004     | CY155248 | CY155249 | CY155247 | CY155242 | CY155245 | CY155244 | CY155243 | CY155246 |
| 864 | B/Victoria/501/2005     | CY155256 | CY155257 | CY155255 | CY155250 | CY155253 | CY155252 | CY155251 | CY155254 |
| 865 | B/Victoria/2/2005       | CY155264 | CY155265 | CY155263 | CY155258 | CY155261 | CY155260 | CY155259 | CY155262 |
| 866 | B/Victoria/102/2005     | CY155272 | CY155273 | CY155271 | CY155266 | CY155269 | CY155268 | CY155267 | CY155270 |
| 867 | B/Victoria/502/2005     | CY155280 | CY155281 | CY155279 | CY155274 | CY155277 | CY155276 | CY155275 | CY155278 |
| 868 | B/Waikato/1/2005        | CY150465 | CY150466 | CY150464 | CY150459 | CY150462 | CY150461 | CY150460 | CY150463 |
| 869 | B/Brisbane/2/2005       | CY155288 | CY155289 | CY155287 | CY155282 | CY155285 | CY155284 | CY155283 | CY155286 |
| 870 | B/Victoria/503/2005     | CY150473 | CY150474 | CY150472 | CY150467 | CY150470 | CY150469 | CY150468 | CY150471 |
| 871 | B/Christchurch/4/2005   | CY150481 | CY150482 | CY150480 | CY150475 | CY150478 | CY150477 | CY150476 | CY150479 |
| 872 | B/Brisbane/3/2005       | CY155296 | CY155297 | CY155295 | CY155290 | CY155293 | CY155292 | CY155291 | CY155294 |
| 873 | B/Christchurch/28/2005  | CY155304 | CY155305 | CY155303 | CY155298 | CY155301 | CY155300 | CY155299 | CY155302 |
| 874 | B/Sydney/1/2005         | CY155312 | CY155313 | CY155311 | CY155306 | CY155309 | CY155308 | CY155307 | CY155310 |
| 875 | B/Auckland/3/2005       | CY155320 | CY155321 | CY155319 | CY155314 | CY155317 | CY155316 | CY155315 | CY155318 |
| 876 | B/Christchurch/8/2005   | CY150489 | CY150490 | CY150488 | CY150483 | CY150486 | CY150485 | CY150484 | CY150487 |
| 877 | B/Auckland/8/2005       | CY155328 | CY155329 | CY155327 | CY155322 | CY155325 | CY155324 | CY155323 | CY155326 |
| 878 | B/Sydney/2/2005         | CY155336 | CY155337 | CY155335 | CY155330 | CY155333 | CY155332 | CY155331 | CY155334 |
| 879 | B/Waikato/5/2005        | CY155344 | CY155345 | CY155343 | CY155338 | CY155341 | CY155340 | CY155339 | CY155342 |
| 880 | B/Brisbane/4/2005       | CY155352 | CY155353 | CY155351 | CY155346 | CY155349 | CY155348 | CY155347 | CY155350 |
| 881 | B/Victoria/504/2005     | CY155360 | CY155361 | CY155359 | CY155354 | CY155357 | CY155356 | CY155355 | CY155358 |
| 882 | B/Waikato/20/2005       | CY155368 | CY155369 | CY155367 | CY155362 | CY155365 | CY155364 | CY155363 | CY155366 |
| 883 | B/Wellington/16/2005    | CY155376 | CY155377 | CY155375 | CY155370 | CY155373 | CY155372 | CY155371 | CY155374 |
| 884 | B/Auckland/32/2005      | CY155384 | CY155385 | CY155383 | CY155378 | CY155381 | CY155380 | CY155379 | CY155382 |
| 885 | B/Wellington/23/2005    | CY155392 | CY155393 | CY155391 | CY155386 | CY155389 | CY155388 | CY155387 | CY155390 |
| 886 | B/Victoria/507/2005     | CY155400 | CY155401 | CY155399 | CY155394 | CY155397 | CY155396 | CY155395 | CY155398 |
| 887 | B/Christchurch/38/2005  | CY150497 | CY150498 | CY150496 | CY150491 | CY150494 | CY150493 | CY150492 | CY150495 |
| 888 | B/Waikato/49/2005       | CY155408 | CY155409 | CY155407 | CY155402 | CY155405 | CY155404 | CY155403 | CY155406 |
| 889 | B/Waikato/70/2005       | CY155416 | CY155417 | CY155415 | CY155410 | CY155413 | CY155412 | CY155411 | CY155414 |
| 890 | B/Wellington/43/2005    | CY155424 | CY155425 | CY155423 | CY155418 | CY155421 | CY155420 | CY155419 | CY155422 |
| 891 | B/Waikato/86/2005       | CY155440 | CY155441 | CY155439 | CY155434 | CY155437 | CY155436 | CY155435 | CY155438 |
| 892 | B/Auckland/107/2005     | CY155448 | CY155449 | CY155447 | CY155442 | CY155445 | CY155444 | CY155443 | CY155446 |
| 893 | B/Waikato/146/2005      | CY150513 | CY150514 | CY150512 | CY150507 | CY150510 | CY150509 | CY150508 | CY150511 |
| 894 | B/Christchurch/278/2005 | CY155456 | CY155457 | CY155455 | CY155450 | CY155453 | CY155452 | CY155451 | CY155454 |
| 895 | B/Townsville/107/2005   | CY150521 | CY150522 | CY150520 | CY150515 | CY150518 | CY150517 | CY150516 | CY150519 |
| 896 | B/Waikato/177/2005      | CY155464 | CY155465 | CY155463 | CY155458 | CY155461 | CY155460 | CY155459 | CY155462 |
| 897 | B/Waikato/164/2005      | CY155472 | CY155473 | CY155471 | CY155466 | CY155469 | CY155468 | CY155467 | CY155470 |
| 898 | B/Victoria/117/2005     | CY150529 | CY150530 | CY150528 | CY150523 | CY150526 | CY150525 | CY150524 | CY150527 |
| 899 | B/Townsville/3/2005     | CY155480 | CY155481 | CY155479 | CY155474 | CY155477 | CY155476 | CY155475 | CY155478 |
| 900 | B/Wellington/86/2005    | CY155488 | CY155489 | CY155487 | CY155482 | CY155485 | CY155484 | CY155483 | CY155486 |
| 901 | B/Sydney/24/2005        | CY150537 | CY150538 | CY150536 | CY150531 | CY150534 | CY150533 | CY150532 | CY150535 |
| 902 | B/Townsville/5/2005     | CY150545 | CY150546 | CY150544 | CY150539 | CY150542 | CY150541 | CY150540 | CY150543 |
| 903 | B/Townsville/7/2005     | CY155496 | CY155497 | CY155495 | CY155490 | CY155493 | CY155492 | CY155491 | CY155494 |

|     |                         |          |          |          |          |          |          |          |          |
|-----|-------------------------|----------|----------|----------|----------|----------|----------|----------|----------|
| 904 | B/Sydney/501/2005       | CY155504 | CY155505 | CY155503 | CY155498 | CY155501 | CY155500 | CY155499 | CY155502 |
| 905 | B/Townsville/11/2005    | CY155512 | CY155513 | CY155511 | CY155506 | CY155509 | CY155508 | CY155507 | CY155510 |
| 906 | B/Brisbane/17/2005      | CY155520 | CY155521 | CY155519 | CY155514 | CY155517 | CY155516 | CY155515 | CY155518 |
| 907 | B/Christchurch/243/2005 | CY155528 | CY155529 | CY155527 | CY155522 | CY155525 | CY155524 | CY155523 | CY155526 |
| 908 | B/Townsville/02/2005    | CY155536 | CY155537 | CY155535 | CY155530 | CY155533 | CY155532 | CY155531 | CY155534 |
| 909 | B/Brisbane/40/2005      | CY150553 | CY150554 | CY150552 | CY150547 | CY150550 | CY150549 | CY150548 | CY150551 |
| 910 | B/Sydney/7/2005         | CY155544 | CY155545 | CY155543 | CY155538 | CY155541 | CY155540 | CY155539 | CY155542 |
| 911 | B/Brisbane/32/2005      | CY155552 | CY155553 | CY155551 | CY155546 | CY155549 | CY155548 | CY155547 | CY155550 |
| 912 | B/Victoria/305/2005     | CY155560 | CY155561 | CY155559 | CY155554 | CY155557 | CY155556 | CY155555 | CY155558 |
| 913 | B/Victoria/306/2005     | CY150561 | CY150562 | CY150560 | CY150555 | CY150558 | CY150557 | CY150556 | CY150559 |
| 914 | B/Townsville/17/2005    | CY150569 | CY150570 | CY150568 | CY150563 | CY150566 | CY150565 | CY150564 | CY150567 |
| 915 | B/Brisbane/42/2005      | CY155568 | CY155569 | CY155567 | CY155562 | CY155565 | CY155564 | CY155563 | CY155566 |
| 916 | B/Sydney/17/2005        | CY155576 | CY155577 | CY155575 | CY155570 | CY155573 | CY155572 | CY155571 | CY155574 |
| 917 | B/Sydney/502/2005       | CY155584 | CY155585 | CY155583 | CY155578 | CY155581 | CY155580 | CY155579 | CY155582 |
| 918 | B/Townsville/16/2005    | CY155592 | CY155593 | CY155591 | CY155586 | CY155589 | CY155588 | CY155587 | CY155590 |
| 919 | B/Sydney/21/2005        | CY155600 | CY155601 | CY155599 | CY155594 | CY155597 | CY155596 | CY155595 | CY155598 |
| 920 | B/Sydney/22/2005        | CY155608 | CY155609 | CY155607 | CY155602 | CY155605 | CY155604 | CY155603 | CY155606 |
| 921 | B/Sydney/23/2005        | CY155616 | CY155617 | CY155615 | CY155610 | CY155613 | CY155612 | CY155611 | CY155614 |
| 922 | B/Christchurch/254/2005 | CY155624 | CY155625 | CY155623 | CY155618 | CY155621 | CY155620 | CY155619 | CY155622 |
| 923 | B/Sydney/13/2005        | CY155632 | CY155633 | CY155631 | CY155626 | CY155629 | CY155628 | CY155627 | CY155630 |
| 924 | B/Victoria/124/2005     | CY155640 | CY155641 | CY155639 | CY155634 | CY155637 | CY155636 | CY155635 | CY155638 |
| 925 | B/Victoria/123/2005     | CY155648 | CY155649 | CY155647 | CY155642 | CY155645 | CY155644 | CY155643 | CY155646 |
| 926 | B/Townsville/15/2005    | CY155656 | CY155657 | CY155655 | CY155650 | CY155653 | CY155652 | CY155651 | CY155654 |
| 927 | B/Brisbane/58/2005      | CY155664 | CY155665 | CY155663 | CY155658 | CY155661 | CY155660 | CY155659 | CY155662 |
| 928 | B/Victoria/125/2005     | CY155672 | CY155673 | CY155671 | CY155666 | CY155669 | CY155668 | CY155667 | CY155670 |
| 929 | B/Sydney/26/2005        | CY155680 | CY155681 | CY155679 | CY155674 | CY155677 | CY155676 | CY155675 | CY155678 |
| 930 | B/Sydney/28/2005        | CY155688 | CY155689 | CY155687 | CY155682 | CY155685 | CY155684 | CY155683 | CY155686 |
| 931 | B/Sydney/14/2005        | CY150577 | CY150578 | CY150576 | CY150571 | CY150574 | CY150573 | CY150572 | CY150575 |
| 932 | B/Townsville/19/2005    | CY155696 | CY155697 | CY155695 | CY155690 | CY155693 | CY155692 | CY155691 | CY155694 |
| 933 | B/Victoria/526/2005     | CY155704 | CY155705 | CY155703 | CY155698 | CY155701 | CY155700 | CY155699 | CY155702 |
| 934 | B/Brisbane/86/2005      | CY155712 | CY155713 | CY155711 | CY155706 | CY155709 | CY155708 | CY155707 | CY155710 |
| 935 | B/Brisbane/93/2005      | CY155720 | CY155721 | CY155719 | CY155714 | CY155717 | CY155716 | CY155715 | CY155718 |
| 936 | B/Brisbane/95/2005      | CY155728 | CY155729 | CY155727 | CY155722 | CY155725 | CY155724 | CY155723 | CY155726 |
| 937 | B/Newcastle/1/2005      | CY155736 | CY155737 | CY155735 | CY155730 | CY155733 | CY155732 | CY155731 | CY155734 |
| 938 | B/Brisbane/100/2005     | CY155744 | CY155745 | CY155743 | CY155738 | CY155741 | CY155740 | CY155739 | CY155742 |
| 939 | B/Victoria/530/2005     | CY155752 | CY155753 | CY155751 | CY155746 | CY155749 | CY155748 | CY155747 | CY155750 |
| 940 | B/Victoria/531/2005     | CY155760 | CY155761 | CY155759 | CY155754 | CY155757 | CY155756 | CY155755 | CY155758 |
| 941 | B/Brisbane/104/2005     | CY155768 | CY155769 | CY155767 | CY155762 | CY155765 | CY155764 | CY155763 | CY155766 |
| 942 | B/Brisbane/105/2005     | CY155776 | CY155777 | CY155775 | CY155770 | CY155773 | CY155772 | CY155771 | CY155774 |
| 943 | B/Brisbane/3/2006       | CY155784 | CY155785 | CY155783 | CY155778 | CY155781 | CY155780 | CY155779 | CY155782 |
| 944 | B/Brisbane/4/2006       | CY155792 | CY155793 | CY155791 | CY155786 | CY155789 | CY155788 | CY155787 | CY155790 |
| 945 | B/Brisbane/5/2006       | CY155800 | CY155801 | CY155799 | CY155794 | CY155797 | CY155796 | CY155795 | CY155798 |
| 946 | B/Townsville/3/2006     | CY155808 | CY155809 | CY155807 | CY155802 | CY155805 | CY155804 | CY155803 | CY155806 |
| 947 | B/Brisbane/6/2006       | CY155816 | CY155817 | CY155815 | CY155810 | CY155813 | CY155812 | CY155811 | CY155814 |
| 948 | B/Townsville/4/2006     | CY155824 | CY155825 | CY155823 | CY155818 | CY155821 | CY155820 | CY155819 | CY155822 |
| 949 | B/Townsville/1/2006     | CY155832 | CY155833 | CY155831 | CY155826 | CY155829 | CY155828 | CY155827 | CY155830 |
| 950 | B/Townsville/2/2006     | CY155840 | CY155841 | CY155839 | CY155834 | CY155837 | CY155836 | CY155835 | CY155838 |
| 951 | B/Waikato/1/2006        | CY155848 | CY155849 | CY155847 | CY155842 | CY155845 | CY155844 | CY155843 | CY155846 |
| 952 | B/Sydney/507/2006       | CY155856 | CY155857 | CY155855 | CY155850 | CY155853 | CY155852 | CY155851 | CY155854 |
| 953 | B/Sydney/511/2006       | CY155864 | CY155865 | CY155863 | CY155858 | CY155861 | CY155860 | CY155859 | CY155862 |
| 954 | B/Sydney/204/2006       | CY150585 | CY150586 | CY150584 | CY150579 | CY150582 | CY150581 | CY150580 | CY150583 |
| 955 | B/Sydney/209/2006       | CY155872 | CY155873 | CY155871 | CY155866 | CY155869 | CY155868 | CY155867 | CY155870 |
| 956 | B/Christchurch/1/2007   | CY155880 | CY155881 | CY155879 | CY155874 | CY155877 | CY155876 | CY155875 | CY155878 |
| 957 | B/Brisbane/1/2007       | CY155888 | CY155889 | CY155887 | CY155882 | CY155885 | CY155884 | CY155883 | CY155886 |
| 958 | B/Christchurch/2/2007   | CY155896 | CY155897 | CY155895 | CY155890 | CY155893 | CY155892 | CY155891 | CY155894 |

|      |                          |          |          |          |          |          |          |          |          |
|------|--------------------------|----------|----------|----------|----------|----------|----------|----------|----------|
| 959  | B/Waikato/01/2007        | CY150593 | CY150594 | CY150592 | CY150587 | CY150590 | CY150589 | CY150588 | CY150591 |
| 960  | B/Brisbane/3/2007        | CY155904 | CY155905 | CY155903 | CY155898 | CY155901 | CY155900 | CY155899 | CY155902 |
| 961  | B/Sydney/1/2007          | CY155912 | CY155913 | CY155911 | CY155906 | CY155909 | CY155908 | CY155907 | CY155910 |
| 962  | B/Christchurch/1002/2007 | CY155920 | CY155921 | CY155919 | CY155914 | CY155917 | CY155916 | CY155915 | CY155918 |
| 963  | B/Auckland/1/2007        | CY155928 | CY155929 | CY155927 | CY155922 | CY155925 | CY155924 | CY155923 | CY155926 |
| 964  | B/Sydney/3/2007          | CY155936 | CY155937 | CY155935 | CY155930 | CY155933 | CY155932 | CY155931 | CY155934 |
| 965  | B/Sydney/500/2007        | CY155944 | CY155945 | CY155943 | CY155938 | CY155941 | CY155940 | CY155939 | CY155942 |
| 966  | B/Victoria/201/2007      | CY150601 | CY150602 | CY150600 | CY150595 | CY150598 | CY150597 | CY150596 | CY150599 |
| 967  | B/Auckland/3/2007        | CY155952 | CY155953 | CY155951 | CY155946 | CY155949 | CY155948 | CY155947 | CY155950 |
| 968  | B/Christchurch/200/2007  | CY150609 | CY150610 | CY150608 | CY150603 | CY150606 | CY150605 | CY150604 | CY150607 |
| 969  | B/Auckland/4/2007        | CY155960 | CY155961 | CY155959 | CY155954 | CY155957 | CY155956 | CY155955 | CY155958 |
| 970  | B/Sydney/2/2007          | CY155968 | CY155969 | CY155967 | CY155962 | CY155965 | CY155964 | CY155963 | CY155966 |
| 971  | B/Waikato/100/2007       | CY155976 | CY155977 | CY155975 | CY155970 | CY155973 | CY155972 | CY155971 | CY155974 |
| 972  | B/Christchurch/18/2007   | CY155984 | CY155985 | CY155983 | CY155978 | CY155981 | CY155980 | CY155979 | CY155982 |
| 973  | B/Sydney/6/2007          | CY155992 | CY155993 | CY155991 | CY155986 | CY155989 | CY155988 | CY155987 | CY155990 |
| 974  | B/Victoria/205/2007      | CY156000 | CY156001 | CY155999 | CY155994 | CY155997 | CY155996 | CY155995 | CY155998 |
| 975  | B/Wellington/1/2007      | CY156008 | CY156009 | CY156007 | CY156002 | CY156005 | CY156004 | CY156003 | CY156006 |
| 976  | B/Wellington/3/2007      | CY156016 | CY156017 | CY156015 | CY156010 | CY156013 | CY156012 | CY156011 | CY156014 |
| 977  | B/Brisbane/8/2007        | CY150617 | CY150618 | CY150616 | CY150611 | CY150614 | CY150613 | CY150612 | CY150615 |
| 978  | B/Brisbane/9/2007        | CY156024 | CY156025 | CY156023 | CY156018 | CY156021 | CY156020 | CY156019 | CY156022 |
| 979  | B/Victoria/802/2007      | CY156032 | CY156033 | CY156031 | CY156026 | CY156029 | CY156028 | CY156027 | CY156030 |
| 980  | B/Townsville/2/2005      | CY150505 | CY150506 | CY150504 | CY150499 | CY150502 | CY150501 | CY150500 | CY150503 |
| 981  | B/Auckland/99/2005       | CY155432 | CY155433 | CY155431 | CY155426 | CY155429 | CY155428 | CY155427 | CY155430 |
| 982  | B/Christchurch/36/2007   | CY150632 | CY150633 | CY150631 | CY150626 | CY150629 | CY150628 | CY150627 | CY150630 |
| 983  | B/Sydney/5/2007          | CY150640 | CY150641 | CY150639 | CY150634 | CY150637 | CY150636 | CY150635 | CY150638 |
| 984  | B/Sydney/502/2007        | CY156040 | CY156041 | CY156039 | CY156034 | CY156037 | CY156036 | CY156035 | CY156038 |
| 985  | B/Victoria/805/2007      | CY156048 | CY156049 | CY156047 | CY156042 | CY156045 | CY156044 | CY156043 | CY156046 |
| 986  | B/Sydney/503/2007        | CY156056 | CY156057 | CY156055 | CY156050 | CY156053 | CY156052 | CY156051 | CY156054 |
| 987  | B/Brisbane/12/2007       | CY150654 | CY150655 | CY150653 | CY150648 | CY150651 | CY150650 | CY150649 | CY150652 |
| 988  | B/Victoria/502/2007      | CY156064 | CY156065 | CY156063 | CY156058 | CY156061 | CY156060 | CY156059 | CY156062 |
| 989  | B/Sydney/201/2007        | CY156072 | CY156073 | CY156071 | CY156066 | CY156069 | CY156068 | CY156067 | CY156070 |
| 990  | B/Christchurch/42/2007   | CY156080 | CY156081 | CY156079 | CY156074 | CY156077 | CY156076 | CY156075 | CY156078 |
| 991  | B/Victoria/863/2007      | CY156088 | CY156089 | CY156087 | CY156082 | CY156085 | CY156084 | CY156083 | CY156086 |
| 992  | B/Wellington/9/2007      | CY156096 | CY156097 | CY156095 | CY156090 | CY156093 | CY156092 | CY156091 | CY156094 |
| 993  | B/Victoria/503/2007      | CY150662 | CY150663 | CY150661 | CY150656 | CY150659 | CY150658 | CY150657 | CY150660 |
| 994  | B/Christchurch/54/2007   | CY150670 | CY150671 | CY150669 | CY150664 | CY150667 | CY150666 | CY150665 | CY150668 |
| 995  | B/Victoria/214/2007      | CY156104 | CY156105 | CY156103 | CY156098 | CY156101 | CY156100 | CY156099 | CY156102 |
| 996  | B/Wellington/10/2007     | CY156112 | CY156113 | CY156111 | CY156106 | CY156109 | CY156108 | CY156107 | CY156110 |
| 997  | B/Christchurch/63/2007   | CY156120 | CY156121 | CY156119 | CY156114 | CY156117 | CY156116 | CY156115 | CY156118 |
| 998  | B/Brisbane/14/2007       | CY150679 | CY150680 | CY150678 | CY150673 | CY150676 | CY150675 | CY150674 | CY150677 |
| 999  | B/Victoria/505/2007      | CY156128 | CY156129 | CY156127 | CY156122 | CY156125 | CY156124 | CY156123 | CY156126 |
| 1000 | B/Victoria/215/2007      | CY156136 | CY156137 | CY156135 | CY156130 | CY156133 | CY156132 | CY156131 | CY156134 |
| 1001 | B/Wellington/11/2007     | CY156144 | CY156145 | CY156143 | CY156138 | CY156141 | CY156140 | CY156139 | CY156142 |
| 1002 | B/Brisbane/16/2007       | CY156152 | CY156153 | CY156151 | CY156146 | CY156149 | CY156148 | CY156147 | CY156150 |
| 1003 | B/Auckland/11/2007       | CY156160 | CY156161 | CY156159 | CY156154 | CY156157 | CY156156 | CY156155 | CY156158 |
| 1004 | B/Victoria/507/2007      | CY156168 | CY156169 | CY156167 | CY156162 | CY156165 | CY156164 | CY156163 | CY156166 |
| 1005 | B/Wellington/12/2007     | CY156176 | CY156177 | CY156175 | CY156170 | CY156173 | CY156172 | CY156171 | CY156174 |
| 1006 | B/Brisbane/18/2007       | CY156184 | CY156185 | CY156183 | CY156178 | CY156181 | CY156180 | CY156179 | CY156182 |
| 1007 | B/Victoria/219/2007      | CY156192 | CY156193 | CY156191 | CY156186 | CY156189 | CY156188 | CY156187 | CY156190 |
| 1008 | B/Victoria/506/2007      | CY156200 | CY156201 | CY156199 | CY156194 | CY156197 | CY156196 | CY156195 | CY156198 |
| 1009 | B/Christchurch/86/2007   | CY156208 | CY156209 | CY156207 | CY156202 | CY156205 | CY156204 | CY156203 | CY156206 |
| 1010 | B/Brisbane/19/2007       | CY156216 | CY156217 | CY156215 | CY156210 | CY156213 | CY156212 | CY156211 | CY156214 |
| 1011 | B/Auckland/14/2007       | CY156224 | CY156225 | CY156223 | CY156218 | CY156221 | CY156220 | CY156219 | CY156222 |
| 1012 | B/Victoria/508/2007      | CY156232 | CY156233 | CY156231 | CY156226 | CY156229 | CY156228 | CY156227 | CY156230 |
| 1013 | B/Victoria/510/2007      | CY156240 | CY156241 | CY156239 | CY156234 | CY156237 | CY156236 | CY156235 | CY156238 |

|      |                         |          |          |          |          |          |          |          |          |
|------|-------------------------|----------|----------|----------|----------|----------|----------|----------|----------|
| 1014 | B/Christchurch/98/2007  | CY156248 | CY156249 | CY156247 | CY156242 | CY156245 | CY156244 | CY156243 | CY156246 |
| 1015 | B/Brisbane/23/2007      | CY156256 | CY156257 | CY156255 | CY156250 | CY156253 | CY156252 | CY156251 | CY156254 |
| 1016 | B/Victoria/224/2007     | CY156264 | CY156265 | CY156263 | CY156258 | CY156261 | CY156260 | CY156259 | CY156262 |
| 1017 | B/Victoria/228/2007     | CY156272 | CY156273 | CY156271 | CY156266 | CY156269 | CY156268 | CY156267 | CY156270 |
| 1018 | B/Victoria/511/2007     | CY156280 | CY156281 | CY156279 | CY156274 | CY156277 | CY156276 | CY156275 | CY156278 |
| 1019 | B/Christchurch/105/2007 | CY156288 | CY156289 | CY156287 | CY156282 | CY156285 | CY156284 | CY156283 | CY156286 |
| 1020 | B/Brisbane/24/2007      | CY156296 | CY156297 | CY156295 | CY156290 | CY156293 | CY156292 | CY156291 | CY156294 |
| 1021 | B/Victoria/512/2007     | CY156304 | CY156305 | CY156303 | CY156298 | CY156301 | CY156300 | CY156299 | CY156302 |
| 1022 | B/Victoria/514/2007     | CY156312 | CY156313 | CY156311 | CY156306 | CY156309 | CY156308 | CY156307 | CY156310 |
| 1023 | B/Brisbane/26/2007      | CY156320 | CY156321 | CY156319 | CY156314 | CY156317 | CY156316 | CY156315 | CY156318 |
| 1024 | B/Victoria/513/2007     | CY156328 | CY156329 | CY156327 | CY156322 | CY156325 | CY156324 | CY156323 | CY156326 |
| 1025 | B/Brisbane/25/2007      | CY156336 | CY156337 | CY156335 | CY156330 | CY156333 | CY156332 | CY156331 | CY156334 |
| 1026 | B/Brisbane/27/2007      | CY156344 | CY156345 | CY156343 | CY156338 | CY156341 | CY156340 | CY156339 | CY156342 |
| 1027 | B/Brisbane/28/2007      | CY156352 | CY156353 | CY156351 | CY156346 | CY156349 | CY156348 | CY156347 | CY156350 |
| 1028 | B/Brisbane/29/2007      | CY156360 | CY156361 | CY156359 | CY156354 | CY156357 | CY156356 | CY156355 | CY156358 |
| 1029 | B/Waikato/809/2007      | CY156368 | CY156369 | CY156367 | CY156362 | CY156365 | CY156364 | CY156363 | CY156366 |
| 1030 | B/Brisbane/30/2007      | CY156376 | CY156377 | CY156375 | CY156370 | CY156373 | CY156372 | CY156371 | CY156374 |
| 1031 | B/Brisbane/32/2007      | CY156384 | CY156385 | CY156383 | CY156378 | CY156381 | CY156380 | CY156379 | CY156382 |
| 1032 | B/Brisbane/31/2007      | CY156392 | CY156393 | CY156391 | CY156386 | CY156389 | CY156388 | CY156387 | CY156390 |
| 1033 | B/Brisbane/1/2008       | CY156400 | CY156401 | CY156399 | CY156394 | CY156397 | CY156396 | CY156395 | CY156398 |
| 1034 | B/Christchurch/2/2008   | CY150687 | CY150688 | CY150686 | CY150681 | CY150684 | CY150683 | CY150682 | CY150685 |
| 1035 | B/Brisbane/2/2008       | CY156408 | CY156409 | CY156407 | CY156402 | CY156405 | CY156404 | CY156403 | CY156406 |
| 1036 | B/Brisbane/3/2008       | CY150695 | CY150696 | CY150694 | CY150689 | CY150692 | CY150691 | CY150690 | CY150693 |
| 1037 | B/Brisbane/5/2008       | CY156416 | CY156417 | CY156415 | CY156410 | CY156413 | CY156412 | CY156411 | CY156414 |
| 1038 | B/Auckland/1/2008       | CY150703 | CY150704 | CY150702 | CY150697 | CY150700 | CY150699 | CY150698 | CY150701 |
| 1039 | B/Brisbane/10/2008      | CY156424 | CY156425 | CY156423 | CY156418 | CY156421 | CY156420 | CY156419 | CY156422 |
| 1040 | B/Auckland/2/2008       | CY150711 | CY150712 | CY150710 | CY150705 | CY150708 | CY150707 | CY150706 | CY150709 |
| 1041 | B/Brisbane/11/2008      | CY156432 | CY156433 | CY156431 | CY156426 | CY156429 | CY156428 | CY156427 | CY156430 |
| 1042 | B/Brisbane/13/2008      | CY156440 | CY156441 | CY156439 | CY156434 | CY156437 | CY156436 | CY156435 | CY156438 |
| 1043 | B/Brisbane/12/2008      | CY156448 | CY156449 | CY156447 | CY156442 | CY156445 | CY156444 | CY156443 | CY156446 |
| 1044 | B/Auckland/3/2008       | CY156456 | CY156457 | CY156455 | CY156450 | CY156453 | CY156452 | CY156451 | CY156454 |
| 1045 | B/Sydney/2/2008         | CY150719 | CY150720 | CY150718 | CY150713 | CY150716 | CY150715 | CY150714 | CY150717 |
| 1046 | B/Waikato/2/2008        | CY150727 | CY150728 | CY150726 | CY150721 | CY150724 | CY150723 | CY150722 | CY150725 |
| 1047 | B/Sydney/3/2008         | CY156464 | CY156465 | CY156463 | CY156458 | CY156461 | CY156460 | CY156459 | CY156462 |
| 1048 | B/Brisbane/14/2008      | CY156472 | CY156473 | CY156471 | CY156466 | CY156469 | CY156468 | CY156467 | CY156470 |
| 1049 | B/Christchurch/6/2008   | CY150742 | CY150744 | CY150741 | CY150736 | CY150739 | CY150738 | CY150737 | CY150740 |
| 1050 | B/Brisbane/17/2008      | CY156480 | CY156481 | CY156479 | CY156474 | CY156477 | CY156476 | CY156475 | CY156478 |
| 1051 | B/Sydney/508/2008       | CY156488 | CY156489 | CY156487 | CY156482 | CY156485 | CY156484 | CY156483 | CY156486 |
| 1052 | B/Wellington/4/2008     | CY150751 | CY150752 | CY150750 | CY150745 | CY150748 | CY150747 | CY150746 | CY150749 |
| 1053 | B/Sydney/5/2008         | CY156496 | CY156497 | CY156495 | CY156490 | CY156493 | CY156492 | CY156491 | CY156494 |
| 1054 | B/Brisbane/21/2008      | CY156504 | CY156505 | CY156503 | CY156498 | CY156501 | CY156500 | CY156499 | CY156502 |
| 1055 | B/Christchurch/3/2008   | CY150759 | CY150760 | CY150758 | CY150753 | CY150756 | CY150755 | CY150754 | CY150757 |
| 1056 | B/Auckland/12/2008      | CY156512 | CY156513 | CY156511 | CY156506 | CY156509 | CY156508 | CY156507 | CY156510 |
| 1057 | B/Sydney/8/2008         | CY156520 | CY156521 | CY156519 | CY156514 | CY156517 | CY156516 | CY156515 | CY156518 |
| 1058 | B/Brisbane/22/2008      | CY156528 | CY156529 | CY156527 | CY156522 | CY156525 | CY156524 | CY156523 | CY156526 |
| 1059 | B/Sydney/61/2008        | CY156536 | CY156537 | CY156535 | CY156530 | CY156533 | CY156532 | CY156531 | CY156534 |
| 1060 | B/Wellington/9/2008     | CY156544 | CY156545 | CY156543 | CY156538 | CY156541 | CY156540 | CY156539 | CY156542 |
| 1061 | B/Brisbane/31/2008      | CY156552 | CY156553 | CY156551 | CY156546 | CY156549 | CY156548 | CY156547 | CY156550 |
| 1062 | B/Auckland/33/2008      | CY156560 | CY156561 | CY156559 | CY156554 | CY156557 | CY156556 | CY156555 | CY156558 |
| 1063 | B/Sydney/62/2008        | CY156568 | CY156569 | CY156567 | CY156562 | CY156565 | CY156564 | CY156563 | CY156566 |
| 1064 | B/Wellington/13/2008    | CY156576 | CY156577 | CY156575 | CY156570 | CY156573 | CY156572 | CY156571 | CY156574 |
| 1065 | B/Auckland/41/2008      | CY150767 | CY150768 | CY150766 | CY150761 | CY150764 | CY150763 | CY150762 | CY150765 |
| 1066 | B/Brisbane/40/2008      | CY150775 | CY150776 | CY150774 | CY150769 | CY150772 | CY150771 | CY150770 | CY150773 |
| 1067 | B/Sydney/13/2008        | CY156584 | CY156585 | CY156583 | CY156578 | CY156581 | CY156580 | CY156579 | CY156582 |
| 1068 | B/Brisbane/30/2008      | CY156592 | CY156593 | CY156591 | CY156586 | CY156589 | CY156588 | CY156587 | CY156590 |

|      |                         |          |          |          |          |          |          |          |          |
|------|-------------------------|----------|----------|----------|----------|----------|----------|----------|----------|
| 1069 | B/Wellington/19/2008    | CY156600 | CY156601 | CY156599 | CY156594 | CY156597 | CY156596 | CY156595 | CY156598 |
| 1070 | B/Auckland/63/2008      | CY156608 | CY156609 | CY156607 | CY156602 | CY156605 | CY156604 | CY156603 | CY156606 |
| 1071 | B/Christchurch/13/2008  | CY150783 | CY150784 | CY150782 | CY150777 | CY150780 | CY150779 | CY150778 | CY150781 |
| 1072 | B/Sydney/24/2008        | CY156616 | CY156617 | CY156615 | CY156610 | CY156613 | CY156612 | CY156611 | CY156614 |
| 1073 | B/Brisbane/34/2008      | CY156624 | CY156625 | CY156623 | CY156618 | CY156621 | CY156620 | CY156619 | CY156622 |
| 1074 | B/Christchurch/29/2008  | CY150791 | CY150792 | CY150790 | CY150785 | CY150788 | CY150787 | CY150786 | CY150789 |
| 1075 | B/Brisbane/48/2008      | CY156632 | CY156633 | CY156631 | CY156626 | CY156629 | CY156628 | CY156627 | CY156630 |
| 1076 | B/Sydney/69/2008        | CY156640 | CY156641 | CY156639 | CY156634 | CY156637 | CY156636 | CY156635 | CY156638 |
| 1077 | B/Brisbane/80/2008      | CY156648 | CY156649 | CY156647 | CY156642 | CY156645 | CY156644 | CY156643 | CY156646 |
| 1078 | B/Sydney/520/2008       | CY156656 | CY156657 | CY156655 | CY156650 | CY156653 | CY156652 | CY156651 | CY156654 |
| 1079 | B/Brisbane/104/2008     | CY156664 | CY156665 | CY156663 | CY156658 | CY156661 | CY156660 | CY156659 | CY156662 |
| 1080 | B/Sydney/522/2008       | CY156672 | CY156673 | CY156671 | CY156666 | CY156669 | CY156668 | CY156667 | CY156670 |
| 1081 | B/Auckland/97/2008      | CY156680 | CY156681 | CY156679 | CY156674 | CY156677 | CY156676 | CY156675 | CY156678 |
| 1082 | B/Sydney/76/2008        | CY156688 | CY156689 | CY156687 | CY156682 | CY156685 | CY156684 | CY156683 | CY156686 |
| 1083 | B/Brisbane/86/2008      | CY156696 | CY156697 | CY156695 | CY156690 | CY156693 | CY156692 | CY156691 | CY156694 |
| 1084 | B/Wellington/31/2008    | CY156704 | CY156705 | CY156703 | CY156698 | CY156701 | CY156700 | CY156699 | CY156702 |
| 1085 | B/Sydney/524/2008       | CY156712 | CY156713 | CY156711 | CY156706 | CY156709 | CY156708 | CY156707 | CY156710 |
| 1086 | B/Victoria/505/2008     | CY156720 | CY156721 | CY156719 | CY156714 | CY156717 | CY156716 | CY156715 | CY156718 |
| 1087 | B/Sydney/34/2008        | CY150799 | CY150800 | CY150798 | CY150793 | CY150796 | CY150795 | CY150794 | CY150797 |
| 1088 | B/Sydney/526/2008       | CY156728 | CY156729 | CY156727 | CY156722 | CY156725 | CY156724 | CY156723 | CY156726 |
| 1089 | B/Victoria/507/2008     | CY156736 | CY156737 | CY156735 | CY156730 | CY156733 | CY156732 | CY156731 | CY156734 |
| 1090 | B/Brisbane/118/2008     | CY156744 | CY156745 | CY156743 | CY156738 | CY156741 | CY156740 | CY156739 | CY156742 |
| 1091 | B/Sydney/35/2008        | CY156752 | CY156753 | CY156751 | CY156746 | CY156749 | CY156748 | CY156747 | CY156750 |
| 1092 | B/Brisbane/115/2008     | CY150807 | CY150808 | CY150806 | CY150801 | CY150804 | CY150803 | CY150802 | CY150805 |
| 1093 | B/Sydney/50/2008        | CY150815 | CY150816 | CY150814 | CY150809 | CY150812 | CY150811 | CY150810 | CY150813 |
| 1094 | B/Auckland/136/2008     | CY156760 | CY156761 | CY156759 | CY156754 | CY156757 | CY156756 | CY156755 | CY156758 |
| 1095 | B/Brisbane/162/2008     | CY156768 | CY156769 | CY156767 | CY156762 | CY156765 | CY156764 | CY156763 | CY156766 |
| 1096 | B/Sydney/102/2008       | CY156776 | CY156777 | CY156775 | CY156770 | CY156773 | CY156772 | CY156771 | CY156774 |
| 1097 | B/Christchurch/99/2008  | CY150823 | CY150824 | CY150822 | CY150817 | CY150820 | CY150819 | CY150818 | CY150821 |
| 1098 | B/Victoria/224/2008     | CY156784 | CY156785 | CY156783 | CY156778 | CY156781 | CY156780 | CY156779 | CY156782 |
| 1099 | B/Sydney/540-a/2008     | CY156792 | CY156793 | CY156791 | CY156786 | CY156789 | CY156788 | CY156787 | CY156790 |
| 1100 | B/Sydney/45/2008        | CY156800 | CY156801 | CY156799 | CY156794 | CY156797 | CY156796 | CY156795 | CY156798 |
| 1101 | B/Sydney/106/2008       | CY156808 | CY156809 | CY156807 | CY156802 | CY156805 | CY156804 | CY156803 | CY156806 |
| 1102 | B/Victoria/525/2008     | CY156816 | CY156817 | CY156815 | CY156810 | CY156813 | CY156812 | CY156811 | CY156814 |
| 1103 | B/Victoria/524/2008     | CY156824 | CY156825 | CY156823 | CY156818 | CY156821 | CY156820 | CY156819 | CY156822 |
| 1104 | B/Victoria/523/2008     | CY156832 | CY156833 | CY156831 | CY156826 | CY156829 | CY156828 | CY156827 | CY156830 |
| 1105 | B/Sydney/105/2008       | CY156840 | CY156841 | CY156839 | CY156834 | CY156837 | CY156836 | CY156835 | CY156838 |
| 1106 | B/Victoria/526/2008     | CY156848 | CY156849 | CY156847 | CY156842 | CY156845 | CY156844 | CY156843 | CY156846 |
| 1107 | B/Auckland/159/2008     | CY156856 | CY156857 | CY156855 | CY156850 | CY156853 | CY156852 | CY156851 | CY156854 |
| 1108 | B/Victoria/230/2008     | CY156864 | CY156865 | CY156863 | CY156858 | CY156861 | CY156860 | CY156859 | CY156862 |
| 1109 | B/Brisbane/168/2008     | CY156872 | CY156873 | CY156871 | CY156866 | CY156869 | CY156868 | CY156867 | CY156870 |
| 1110 | B/Sydney/111/2008       | CY156880 | CY156881 | CY156879 | CY156874 | CY156877 | CY156876 | CY156875 | CY156878 |
| 1111 | B/Brisbane/164/2008     | CY156888 | CY156889 | CY156887 | CY156882 | CY156885 | CY156884 | CY156883 | CY156886 |
| 1112 | B/Sydney/51/2008        | CY156896 | CY156897 | CY156895 | CY156890 | CY156893 | CY156892 | CY156891 | CY156894 |
| 1113 | B/Victoria/500/2011     | CY156904 | CY156905 | CY156903 | CY156898 | CY156901 | CY156900 | CY156899 | CY156902 |
| 1114 | B/Townsville/2/2011     | CY156912 | CY156913 | CY156911 | CY156906 | CY156909 | CY156908 | CY156907 | CY156910 |
| 1115 | B/South Auckland/5/2011 | CY156920 | CY156921 | CY156919 | CY156914 | CY156917 | CY156916 | CY156915 | CY156918 |
| 1116 | B/Brisbane/112/2011     | CY156928 | CY156929 | CY156927 | CY156922 | CY156925 | CY156924 | CY156923 | CY156926 |
| 1117 | B/Brisbane/121/2011     | CY156936 | CY156937 | CY156935 | CY156930 | CY156933 | CY156932 | CY156931 | CY156934 |
| 1118 | B/Brisbane/125/2011     | CY156944 | CY156945 | CY156943 | CY156938 | CY156941 | CY156940 | CY156939 | CY156942 |
| 1119 | B/Russia/69             | KJ162578 | KJ162577 | KJ162579 | KJ162580 | KJ162581 | KJ162582 | KJ162583 | KJ162584 |

Note: The viruses highlighted in yellow color are the ones used in Fig. 3 and amplicons of the B/Russia/69 and B/Brisbane/60-10/2012 were cloned into reverse-genetics plasmids to generate viruses as shown in Fig. 4.
